# Supplementary material for: State-interaction pair density functional theory for locally avoided crossings of potential energy surfaces in methylamine
Source: Royal Society of Chemistry journal article supplement (doi:10.1039/c9cp02240f), 2019-01-01
Supplement: c9cp02240f1.pdf [file c9cp02240f1.pdf]

ELECTRONIC SUPPLEMENTARY INFORMATION

APR. 20, 2019

**State-Interaction Pair Density Functional Theory for Locally Avoided  
Crossings of Potential Energy Surfaces in Methylamine**

Chen Zhou, Laura Gagliardi,\* and Donald G. Truhlar\*

*Department of Chemistry, Chemical Theory Center, and Supercomputing Institute, University of  
Minnesota, Minneapolis MN 55455-0431*

\*email: [gagliardi@umn.edu](mailto:gagliardi@umn.edu), [truhlar@umn.edu](mailto:truhlar@umn.edu)

TABLE OF CONTENTS

|                                                                                                 |      |
|-------------------------------------------------------------------------------------------------|------|
| Equilibrium geometries of methylamine                                                           | S-2  |
| SI-PDFT PESs for N-H bond fission of methylamine near the LAC region compared<br>with MS-CASPT2 | S-3  |
| Absolute energies for the PESs of N-H bond fission                                              | S-4  |
| Absolute energies for the PESs of N-H bond fission near LAC                                     | S-10 |
| Natural orbitals of SA-CASSCF calculations with equilibrium geometry                            | S-15 |
| Natural orbitals of SA-CASSCF calculations near LAC                                             | S-23 |

## Equilibrium geometries of methylamine in Angstrom

### (1) eclipsed conformation

|   |             |             |             |
|---|-------------|-------------|-------------|
| N | 0.00204548  | 0.00000628  | 0.70120476  |
| H | 0.86019472  | -0.00004443 | 1.22059368  |
| H | -0.85421062 | -0.00004310 | 1.22119778  |
| C | 0.00189000  | -0.00000336 | -0.73696735 |
| H | 0.48596395  | -0.88475017 | -1.15933997 |
| H | -1.02936905 | 0.00030991  | -1.08536656 |
| H | 0.48647422  | 0.88448059  | -1.15929482 |

### (2) staggered conformation

|   |             |             |             |
|---|-------------|-------------|-------------|
| N | -0.12310328 | 0.00071775  | 0.72548952  |
| H | -0.14497838 | -0.94901180 | 1.08504480  |
| H | -0.14273413 | 0.94922612  | 1.08510310  |
| C | -0.00066684 | 0.00002564  | -0.72911010 |
| H | -0.50666214 | 0.87808667  | -1.12875744 |
| H | 1.02787763  | 0.00059336  | -1.10940810 |
| H | -0.50604478 | -0.87873943 | -1.12824836 |

### (3) H6-C4-N1-H3 dihedral angle equaling 95°

|   |             |             |             |
|---|-------------|-------------|-------------|
| N | -0.12310328 | 0.00071775  | 0.72548952  |
| H | -0.23506087 | -0.94550075 | 1.07746126  |
| H | -0.23641226 | 0.94561052  | 1.07721977  |
| C | -0.00066684 | 0.00002564  | -0.72911010 |
| H | -0.50666214 | 0.87808667  | -1.12875744 |
| H | 1.02787763  | 0.00059336  | -1.10940810 |
| H | -0.50604478 | -0.87873943 | -1.12824836 |

### (4) H6-C4-N1-H3 dihedral angle equaling 100°

|   |             |             |             |
|---|-------------|-------------|-------------|
| N | -0.12310328 | 0.00071775  | 0.72548952  |
| H | -0.30947164 | -0.93603241 | 1.07119290  |
| H | -0.30699192 | 0.93665960  | 1.07128320  |
| C | -0.00066684 | 0.00002564  | -0.72911010 |
| H | -0.50666214 | 0.87808667  | -1.12875744 |
| H | 1.02787763  | 0.00059336  | -1.10940810 |
| H | -0.50604478 | -0.87873943 | -1.12824836 |

### SI-PDFT PESs for N-H bond fission of methylamine near the LAC region compared with MS-CASPT2

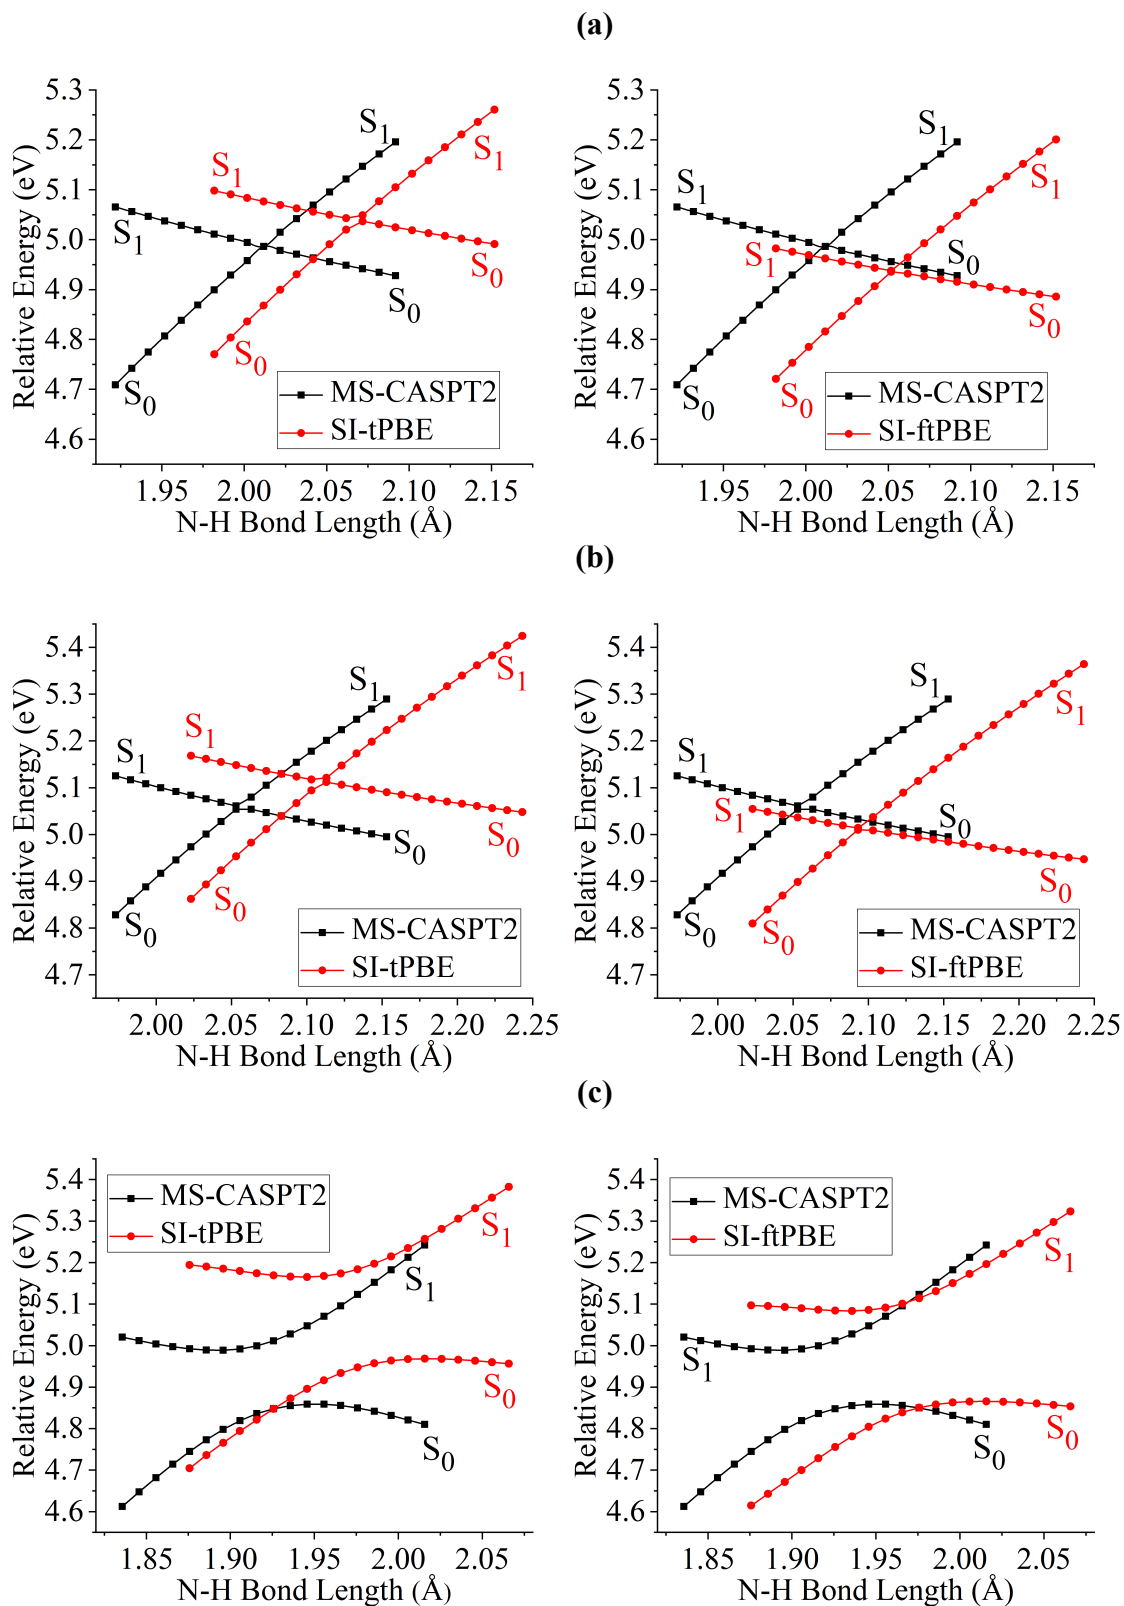

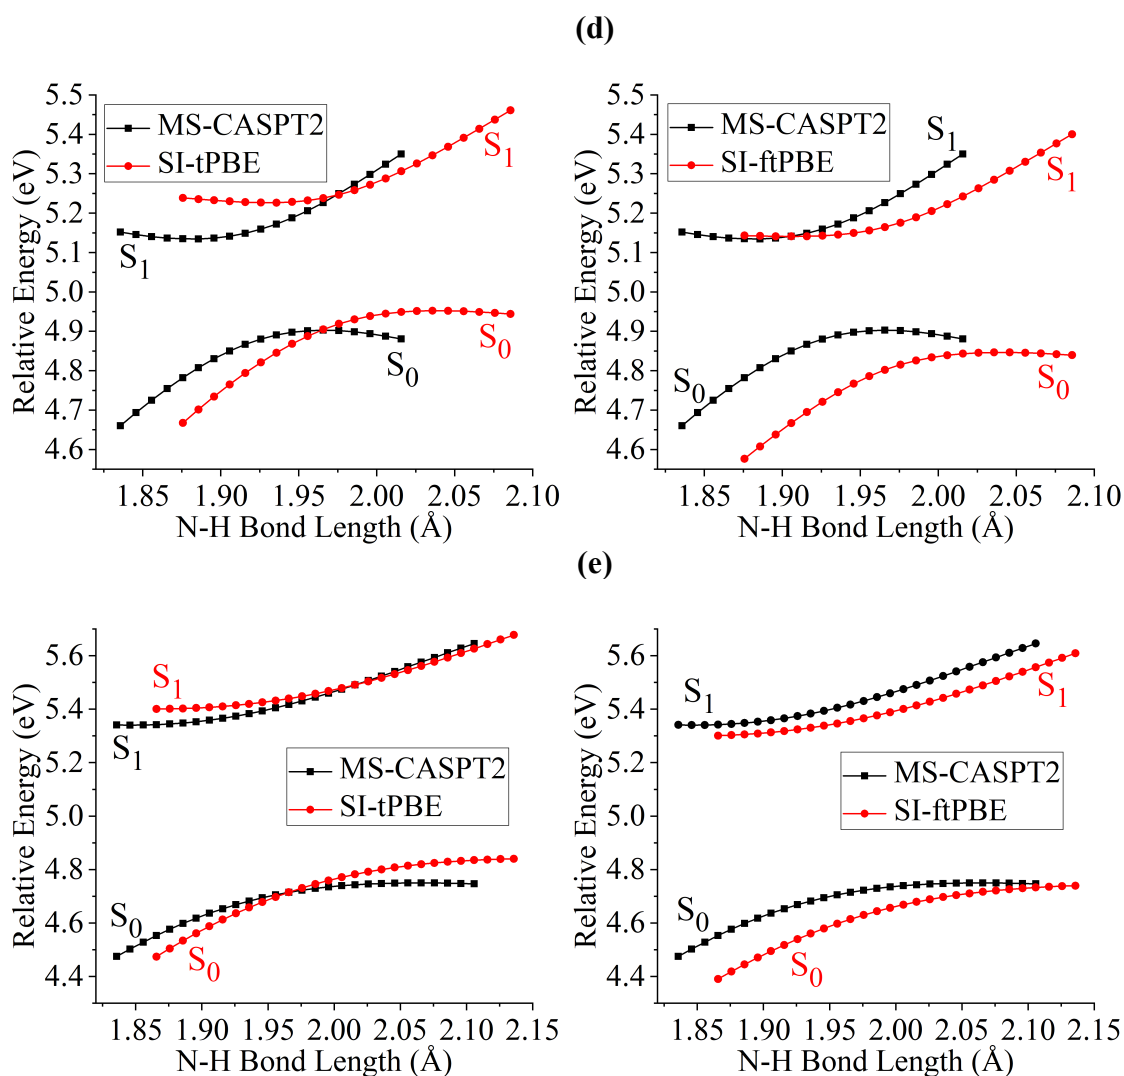

**Figure S1.** SI-PDFT PESs for N-H bond fission of methylamine with (a) eclipsed-H3 conformation, (b) eclipsed-H2 conformation, (c) staggered conformation, (d) H6-C4-N1-H3 dihedral angle equaling  $95^\circ$  and (e)  $100^\circ$  near the LAC region compared with MS-CASPT2 method. The relative energies are compared with those of ground state geometry for each method.

## Absolute energies (in a.u.) for the PESs of N-H Bond fission

### (1) N-H3 bond fission of eclipsed conformation

| $R_{N-H}$ (Å) | MS-CASPT2    |              | XMS-CASPT2   |              | SI-IPBE      |              | SI-ftPBE     |              |
|---------------|--------------|--------------|--------------|--------------|--------------|--------------|--------------|--------------|
|               | E0           | E1           | E0           | E1           | E0           | E1           | E0           | E1           |
| 0.602         | -95.14323782 | -94.94263956 | -95.14952539 | -94.95053699 | -95.30344282 | -95.09055447 | -95.34388245 | -95.12953603 |
| 0.702         | -95.37473401 | -95.17792995 | -95.38122353 | -95.18588867 | -95.53265117 | -95.32990114 | -95.57403811 | -95.36355576 |
| 0.802         | -95.48609977 | -95.29309591 | -95.49284820 | -95.30135140 | -95.64405704 | -95.44532712 | -95.68245648 | -95.48381367 |
| 0.902         | -95.53239471 | -95.34366316 | -95.53944194 | -95.35231655 | -95.69091972 | -95.49552441 | -95.72900986 | -95.53426246 |
| 1.002         | -95.54322490 | -95.35968464 | -95.55062431 | -95.36896428 | -95.70330131 | -95.51482121 | -95.74073956 | -95.55191419 |
| 1.102         | -95.53582342 | -95.36074925 | -95.54281982 | -95.36886983 | -95.69880965 | -95.51268135 | -95.73854302 | -95.55065588 |
| 1.202         | -95.51893456 | -95.35457136 | -95.52521611 | -95.36326895 | -95.68401240 | -95.51007476 | -95.72385890 | -95.54817136 |
| 1.302         | -95.49783681 | -95.34997380 | -95.50260270 | -95.35880559 | -95.66481307 | -95.50895230 | -95.69489473 | -95.54427168 |
| 1.402         | -95.47525774 | -95.34946429 | -95.48184183 | -95.35636271 | -95.63745894 | -95.50193740 | -95.67392641 | -95.54392902 |
| 1.502         | -95.45277440 | -95.35182328 | -95.45946915 | -95.35880512 | -95.61615983 | -95.50482429 | -95.65314995 | -95.54695658 |
| 1.602         | -95.43337163 | -95.35434969 | -95.43888968 | -95.36344836 | -95.59587836 | -95.50898620 | -95.63337997 | -95.55111049 |
| 1.702         | -95.41501274 | -95.35980085 | -95.42040405 | -95.36825284 | -95.57715914 | -95.51325110 | -95.61515728 | -95.55529529 |
| 1.802         | -95.39886166 | -95.36460411 | -95.40416305 | -95.37256521 | -95.56029335 | -95.51715897 | -95.59876150 | -95.55907912 |
| 1.902         | -95.38499051 | -95.36865801 | -95.39019932 | -95.37624482 | -95.54541541 | -95.52056993 | -95.58430785 | -95.56233048 |
| 2.002         | -95.37333185 | -95.37199140 | -95.37813808 | -95.37810167 | -95.53255067 | -95.52345294 | -95.57178039 | -95.56501387 |
| 2.102         | -95.37469907 | -95.36372549 | -95.38068719 | -95.36852444 | -95.52583092 | -95.52167086 | -95.56717739 | -95.56113687 |
| 2.202         | -95.37682546 | -95.35595569 | -95.38272056 | -95.36078640 | -95.52774893 | -95.51267755 | -95.56887656 | -95.55225910 |
| 2.302         | -95.37850949 | -95.34979157 | -95.38432248 | -95.35464790 | -95.52927455 | -95.50540216 | -95.57015698 | -95.54489932 |
| 2.402         | -95.37981720 | -95.34498640 | -95.38557136 | -95.34985845 | -95.53047416 | -95.49964585 | -95.57113351 | -95.53924978 |
| 2.502         | -95.38082848 | -95.34129353 | -95.38653613 | -95.34617558 | -95.53140864 | -95.49519693 | -95.57185079 | -95.53441335 |
| 2.602         | -95.38159417 | -95.33849209 | -95.38727590 | -95.34337833 | -95.53213229 | -95.49180764 | -95.57237317 | -95.53088416 |
| 2.702         | -95.38218518 | -95.33639095 | -95.38784024 | -95.34127528 | -95.53269763 | -95.48927661 | -95.57275154 | -95.52824234 |
| 2.802         | -95.38263497 | -95.33482873 | -95.38826965 | -95.33970710 | -95.53313855 | -95.48741836 | -95.57303180 | -95.52609580 |
| 2.902         | -95.38296462 | -95.33367605 | -95.38859622 | -95.33854530 | -95.53348632 | -95.48607304 | -95.57323301 | -95.52447543 |
| 3.002         | -95.38322233 | -95.33283136 | -95.38884458 | -95.33768863 | -95.53376368 | -95.48511083 | -95.57337835 | -95.52339395 |
| 3.102         | -95.38341661 | -95.33221436 | -95.38903331 | -95.33705887 | -95.53398485 | -95.48443516 | -95.57349942 | -95.52252671 |
| 3.202         | -95.38356435 | -95.33176389 | -95.38917626 | -95.33659647 | -95.53416212 | -95.48396582 | -95.57357946 | -95.52189753 |
| 3.302         | -95.38366054 | -95.33142984 | -95.38928386 | -95.33625674 | -95.53430469 | -95.48364349 | -95.57364416 | -95.52145532 |
| 3.402         | -95.38374363 | -95.33118787 | -95.38936411 | -95.33600664 | -95.53441844 | -95.48342557 | -95.57370070 | -95.52115004 |
| 3.502         | -95.38380477 | -95.33100575 | -95.38942328 | -95.33582192 | -95.53450950 | -95.48328275 | -95.57374088 | -95.52090032 |
| 3.602         | -95.38384808 | -95.33086570 | -95.38946633 | -95.33568497 | -95.53458233 | -95.48318923 | -95.57376915 | -95.52073176 |
| 4.602         | -95.38393574 | -95.33041496 | -95.38956080 | -95.33529921 | -95.53476488 | -95.48303817 | -95.57380392 | -95.52033968 |
| 5.602         | -95.38389242 | -95.33035181 | -95.38954952 | -95.33526716 | -95.53476427 | -95.48305307 | -95.57379277 | -95.52033741 |
| 7.602         | -95.38386981 | -95.33030539 | -95.38953741 | -95.33525593 | -95.53476097 | -95.48305566 | -95.57378768 | -95.52033852 |

## (2) N-H2 bond fission of eclipsed conformation

| R <sub>N-H</sub> (Å) | MS-CASPT2    |              | XMS-CASPT2   |              | SI-IPBE      |              | SI-rIPBE     |              |
|----------------------|--------------|--------------|--------------|--------------|--------------|--------------|--------------|--------------|
|                      | E0           | E1           | E0           | E1           | E0           | E1           | E0           | E1           |
| 0.603                | -95.14663717 | -94.94683391 | -95.15096127 | -94.95057934 | -95.30553862 | -95.09993585 | -95.34438500 | -95.13902925 |
| 0.703                | -95.37618873 | -95.18005620 | -95.38064878 | -95.18397038 | -95.53403612 | -95.33217459 | -95.57549932 | -95.36595498 |
| 0.803                | -95.48660842 | -95.29419661 | -95.49125018 | -95.29835291 | -95.64451124 | -95.44650884 | -95.68291501 | -95.48498808 |
| 0.903                | -95.53249511 | -95.34413523 | -95.53736877 | -95.34864419 | -95.69096130 | -95.49597841 | -95.72903725 | -95.53473519 |
| 1.003                | -95.54322444 | -95.35968409 | -95.54837472 | -95.36472425 | -95.70289030 | -95.51333939 | -95.74073680 | -95.55190939 |
| 1.103                | -95.53589438 | -95.36012826 | -95.54045618 | -95.36368919 | -95.69874540 | -95.51184952 | -95.73848690 | -95.54982440 |
| 1.203                | -95.51915885 | -95.35293125 | -95.52274910 | -95.35440194 | -95.68408016 | -95.50805215 | -95.72393668 | -95.54610050 |
| 1.303                | -95.49829355 | -95.34710630 | -95.50206306 | -95.34741353 | -95.65907636 | -95.49964808 | -95.69507827 | -95.54104703 |
| 1.403                | -95.47599470 | -95.34576294 | -95.48045855 | -95.34787068 | -95.63790699 | -95.49828106 | -95.67436552 | -95.54023509 |
| 1.503                | -95.45368757 | -95.34763992 | -95.45911766 | -95.35219292 | -95.61685139 | -95.50110100 | -95.65384244 | -95.54319582 |
| 1.603                | -95.43444537 | -95.35036231 | -95.43907362 | -95.35753513 | -95.59677930 | -95.50530035 | -95.63428677 | -95.54739003 |
| 1.703                | -95.41626097 | -95.35585077 | -95.42092303 | -95.36269257 | -95.57823308 | -95.50959915 | -95.61623641 | -95.55162041 |
| 1.803                | -95.40024326 | -95.36068433 | -95.40494174 | -95.36724560 | -95.56150218 | -95.51352810 | -95.59997415 | -95.55543318 |
| 1.903                | -95.38645945 | -95.36476086 | -95.39119571 | -95.37109426 | -95.54671909 | -95.51694604 | -95.58560996 | -95.55869832 |
| 2.003                | -95.37485261 | -95.36811188 | -95.37961766 | -95.37426388 | -95.53391133 | -95.51982655 | -95.57313935 | -95.56138867 |
| 2.103                | -95.37081820 | -95.36525072 | -95.37682727 | -95.37005638 | -95.52588668 | -95.52476160 | -95.56717719 | -95.56113705 |
| 2.203                | -95.37297501 | -95.35747678 | -95.37887177 | -95.36230862 | -95.52668939 | -95.51687605 | -95.56887670 | -95.55225927 |
| 2.303                | -95.37467352 | -95.35128863 | -95.38048398 | -95.35614164 | -95.52822670 | -95.50955983 | -95.57015698 | -95.54489932 |
| 2.403                | -95.37599416 | -95.34644336 | -95.38174288 | -95.35131258 | -95.52943972 | -95.50374623 | -95.57113412 | -95.53924980 |
| 2.503                | -95.37700716 | -95.34270613 | -95.38271760 | -95.34758540 | -95.53038944 | -95.49923109 | -95.57185093 | -95.53441363 |
| 2.603                | -95.37779666 | -95.33985196 | -95.38346728 | -95.34474395 | -95.53112695 | -95.49577467 | -95.57237341 | -95.53088421 |
| 2.703                | -95.37840057 | -95.33770834 | -95.38404147 | -95.34259991 | -95.53170556 | -95.49318252 | -95.57275165 | -95.52824315 |
| 2.803                | -95.37886145 | -95.33610870 | -95.38448056 | -95.34099568 | -95.53159112 | -95.49388441 | -95.57303150 | -95.52609608 |
| 2.903                | -95.37921488 | -95.33492486 | -95.38481649 | -95.33980339 | -95.53251735 | -95.48987718 | -95.57323284 | -95.52447599 |
| 3.003                | -95.37948208 | -95.33405360 | -95.38507375 | -95.33892168 | -95.53280399 | -95.48887507 | -95.57337805 | -95.52339401 |
| 3.103                | -95.37967298 | -95.33341646 | -95.38527077 | -95.33827186 | -95.53303206 | -95.48816744 | -95.57349906 | -95.52252668 |
| 3.203                | -95.37982582 | -95.33295072 | -95.38542129 | -95.33779369 | -95.53321403 | -95.48767161 | -95.57357906 | -95.52189788 |
| 3.303                | -95.37994367 | -95.33261030 | -95.38553566 | -95.33744175 | -95.53336038 | -95.48732723 | -95.57364372 | -95.52145567 |
| 3.403                | -95.38002815 | -95.33235335 | -95.38562184 | -95.33718232 | -95.53347788 | -95.48709212 | -95.57370023 | -95.52115039 |
| 3.503                | -95.38009356 | -95.33216814 | -95.38568611 | -95.33699052 | -95.53357079 | -95.48693635 | -95.57374090 | -95.52090105 |
| 3.603                | -95.38014213 | -95.33202488 | -95.38573346 | -95.33684825 | -95.53364489 | -95.48683316 | -95.57376908 | -95.52073214 |
| 4.603                | -95.38024490 | -95.33155861 | -95.38584339 | -95.33644781 | -95.53384707 | -95.48667606 | -95.57380376 | -95.52033946 |
| 5.603                | -95.38019038 | -95.33149312 | -95.38583386 | -95.33641585 | -95.53384565 | -95.48669024 | -95.57379270 | -95.52033772 |
| 7.603                | -95.38016651 | -95.33144689 | -95.38582281 | -95.33640508 | -95.53383516 | -95.48668596 | -95.57378763 | -95.52033884 |

## (3) staggered conformation

| R <sub>N-H</sub> (Å) | MS-CASPT2    |              | XMS-CASPT2   |              | SI-IPBE      |              | SI-ftPBE     |              |
|----------------------|--------------|--------------|--------------|--------------|--------------|--------------|--------------|--------------|
|                      | E0           | E1           | E0           | E1           | E0           | E1           | E0           | E1           |
| 0.616                | -95.17633535 | -94.97524908 | -95.18280783 | -94.98380007 | -95.33867879 | -95.13390867 | -95.37807846 | -95.17391290 |
| 0.716                | -95.38598919 | -95.18898794 | -95.39262409 | -95.19761416 | -95.54743375 | -95.34696928 | -95.58661453 | -95.38669659 |
| 0.816                | -95.48543252 | -95.29280387 | -95.49227946 | -95.30162737 | -95.64698190 | -95.45125625 | -95.68596699 | -95.49067004 |
| 0.916                | -95.52510033 | -95.33769721 | -95.53213950 | -95.34662454 | -95.68699720 | -95.49648782 | -95.72579653 | -95.53581066 |
| 1.016                | -95.53201973 | -95.35345432 | -95.53947447 | -95.36064847 | -95.69661801 | -95.50931609 | -95.73689540 | -95.54755035 |
| 1.116                | -95.52247378 | -95.35298443 | -95.52945970 | -95.36045045 | -95.68882333 | -95.51159156 | -95.72924651 | -95.54987556 |
| 1.216                | -95.50451264 | -95.34848907 | -95.51055551 | -95.35672757 | -95.67287672 | -95.50997156 | -95.71343480 | -95.54861838 |
| 1.316                | -95.48252253 | -95.34117761 | -95.48949636 | -95.35297185 | -95.64807957 | -95.50330345 | -95.68510265 | -95.54531682 |
| 1.416                | -95.46020311 | -95.34453009 | -95.46646566 | -95.35482799 | -95.62597850 | -95.50413130 | -95.66335943 | -95.54670420 |
| 1.516                | -95.43853869 | -95.35057755 | -95.44421049 | -95.35944299 | -95.60460390 | -95.50820439 | -95.64252071 | -95.55087023 |
| 1.616                | -95.41845042 | -95.35681086 | -95.42385965 | -95.36497728 | -95.58440518 | -95.51294615 | -95.62283605 | -95.55558277 |
| 1.716                | -95.40050572 | -95.36241431 | -95.40578189 | -95.37006872 | -95.56587600 | -95.51746958 | -95.60481059 | -95.56000538 |
| 1.816                | -95.38512679 | -95.36695737 | -95.38979014 | -95.37268916 | -95.54921882 | -95.52134428 | -95.58870702 | -95.56374113 |
| 1.916                | -95.37433744 | -95.36830568 | -95.38045033 | -95.37255550 | -95.53466991 | -95.52328101 | -95.57578782 | -95.56509272 |
| 2.016                | -95.37547338 | -95.35925067 | -95.38160273 | -95.36344830 | -95.53054165 | -95.51994741 | -95.57228925 | -95.56029029 |
| 2.116                | -95.37839135 | -95.35009768 | -95.38385862 | -95.35466396 | -95.53176335 | -95.51071187 | -95.57344163 | -95.55104349 |
| 2.216                | -95.38048121 | -95.34293516 | -95.38578484 | -95.34749995 | -95.53344154 | -95.50236315 | -95.57489128 | -95.54272131 |
| 2.316                | -95.38211573 | -95.33727073 | -95.38732778 | -95.34184384 | -95.53488448 | -95.49556475 | -95.57611435 | -95.53581105 |
| 2.416                | -95.38338576 | -95.33287633 | -95.38853596 | -95.33746689 | -95.53604442 | -95.49021240 | -95.57704082 | -95.53039774 |
| 2.516                | -95.38436060 | -95.32954180 | -95.38946900 | -95.33413187 | -95.53695580 | -95.48610689 | -95.57774514 | -95.52606081 |
| 2.616                | -95.38510177 | -95.32703343 | -95.39018229 | -95.33162176 | -95.53766810 | -95.48301111 | -95.57825915 | -95.52275353 |
| 2.716                | -95.38565173 | -95.32517315 | -95.39072354 | -95.32975061 | -95.53822666 | -95.48072663 | -95.57863975 | -95.52029946 |
| 2.816                | -95.38604407 | -95.32380198 | -95.39113212 | -95.32836600 | -95.53866539 | -95.47906880 | -95.57890442 | -95.51834282 |
| 2.916                | -95.38636708 | -95.32279124 | -95.39143943 | -95.32734697 | -95.53901096 | -95.47787820 | -95.57912325 | -95.51700955 |
| 3.016                | -95.38665682 | -95.32205649 | -95.39166983 | -95.32659966 | -95.53928630 | -95.47704016 | -95.57928073 | -95.51588840 |
| 3.116                | -95.38685817 | -95.32151982 | -95.39184184 | -95.32605265 | -95.53950405 | -95.47645501 | -95.57939574 | -95.51522687 |
| 3.216                | -95.38697630 | -95.32112723 | -95.39196944 | -95.32565228 | -95.53967505 | -95.47605357 | -95.57948123 | -95.51466005 |
| 3.316                | -95.38706121 | -95.32083801 | -95.39206327 | -95.32535879 | -95.53981008 | -95.47577759 | -95.57954655 | -95.51424918 |
| 3.416                | -95.38712610 | -95.32062277 | -95.39213145 | -95.32514301 | -95.53991621 | -95.47559358 | -95.57959499 | -95.51397561 |
| 3.516                | -95.38715350 | -95.32044944 | -95.39218033 | -95.32498375 | -95.54000029 | -95.47547322 | -95.57963149 | -95.51378401 |
| 3.616                | -95.38718855 | -95.32032672 | -95.39221482 | -95.32486571 | -95.54006772 | -95.47539391 | -95.57966045 | -95.51362816 |
| 4.116                | -95.38724316 | -95.32002753 | -95.39227753 | -95.32459828 | -95.54021826 | -95.47528046 | -95.57971276 | -95.51335108 |
| 5.116                | -95.38722002 | -95.31989859 | -95.39227413 | -95.32451097 | -95.54023422 | -95.47527344 | -95.57968723 | -95.51329492 |
| 7.116                | -95.38715697 | -95.31983874 | -95.39225728 | -95.32449164 | -95.54024355 | -95.47529437 | -95.57969510 | -95.51330928 |

## (4) H6-C4-N1-H3 dihedral angle equaling 95°

| $R_{N-H}$ (Å) | MS-CASPT2    |              | XMS-CASPT2   |              | SI- $\rho$ PBE |              | SI-ftPBE     |              |
|---------------|--------------|--------------|--------------|--------------|----------------|--------------|--------------|--------------|
|               | E0           | E1           | E0           | E1           | E0             | E1           | E0           | E1           |
| 0.616         | -95.17688607 | -94.97687925 | -95.18312897 | -94.98369492 | -95.33890661   | -95.13376750 | -95.37807670 | -95.16396513 |
| 0.716         | -95.38652124 | -95.19056021 | -95.39294446 | -95.19750643 | -95.54762590   | -95.34671222 | -95.58661654 | -95.37677174 |
| 0.816         | -95.48593507 | -95.29434625 | -95.49259731 | -95.30150964 | -95.64701973   | -95.45053135 | -95.68604822 | -95.49019432 |
| 0.916         | -95.52551365 | -95.33899961 | -95.53246135 | -95.34649319 | -95.68793362   | -95.49294661 | -95.72624358 | -95.52692307 |
| 1.016         | -95.53248982 | -95.35251597 | -95.53980943 | -95.36049659 | -95.69680807   | -95.50931032 | -95.73061900 | -95.54648522 |
| 1.116         | -95.52199741 | -95.35156680 | -95.52981716 | -95.36026608 | -95.68900341   | -95.51157419 | -95.72692437 | -95.54510653 |
| 1.216         | -95.50248831 | -95.34714346 | -95.51094127 | -95.35649116 | -95.67300261   | -95.50996897 | -95.71107798 | -95.54422257 |
| 1.316         | -95.48319779 | -95.34535434 | -95.48966786 | -95.35235253 | -95.65001158   | -95.50537096 | -95.69050195 | -95.54455270 |
| 1.416         | -95.46063841 | -95.34316381 | -95.46529190 | -95.35074266 | -95.62645093   | -95.50373597 | -95.66031038 | -95.54207050 |
| 1.516         | -95.43899027 | -95.34911790 | -95.44365257 | -95.35638860 | -95.60507839   | -95.50759735 | -95.63934256 | -95.54630185 |
| 1.616         | -95.41901833 | -95.35591758 | -95.42364902 | -95.36219517 | -95.58495474   | -95.51217131 | -95.61970512 | -95.55104990 |
| 1.716         | -95.40123589 | -95.36128978 | -95.40591858 | -95.36728976 | -95.56657346   | -95.51649208 | -95.60186689 | -95.55539326 |
| 1.816         | -95.38622723 | -95.36538564 | -95.39115196 | -95.37098607 | -95.55025876   | -95.51995159 | -95.58628326 | -95.55874449 |
| 1.916         | -95.37619461 | -95.36595769 | -95.38228388 | -95.37035591 | -95.53657412   | -95.52116695 | -95.57435852 | -95.55935889 |
| 2.016         | -95.37597530 | -95.35837672 | -95.38206489 | -95.36260541 | -95.53099579   | -95.51834541 | -95.56963945 | -95.55496660 |
| 2.116         | -95.37839711 | -95.34971316 | -95.38385560 | -95.35427857 | -95.53168892   | -95.50997195 | -95.57010566 | -95.54660937 |
| 2.216         | -95.38028790 | -95.34273436 | -95.38559105 | -95.34730219 | -95.53317833   | -95.50195045 | -95.57133662 | -95.53861827 |
| 2.316         | -95.38181713 | -95.33715875 | -95.38703466 | -95.34174496 | -95.53452899   | -95.49531219 | -95.57244934 | -95.53189008 |
| 2.416         | -95.38302643 | -95.33282048 | -95.38818434 | -95.33742726 | -95.53563953   | -95.49004993 | -95.57332087 | -95.52662968 |
| 2.516         | -95.38396332 | -95.32952641 | -95.38908067 | -95.33413027 | -95.53652282   | -95.48600605 | -95.57398886 | -95.52229541 |
| 2.616         | -95.38467973 | -95.32705401 | -95.38977013 | -95.33164538 | -95.53721794   | -95.48295151 | -95.57447405 | -95.51907655 |
| 2.716         | -95.38521380 | -95.32520447 | -95.39029557 | -95.32979126 | -95.53776562   | -95.48069361 | -95.57483793 | -95.51664413 |
| 2.816         | -95.38558908 | -95.32384643 | -95.39069356 | -95.32841827 | -95.53819861   | -95.47905541 | -95.57508616 | -95.51468891 |
| 2.916         | -95.38590637 | -95.32285025 | -95.39099374 | -95.32740722 | -95.53854195   | -95.47787671 | -95.57529346 | -95.51339305 |
| 3.016         | -95.38619617 | -95.32212106 | -95.39121923 | -95.32666549 | -95.53881593   | -95.47704593 | -95.57544319 | -95.51231055 |
| 3.116         | -95.38637516 | -95.32158839 | -95.39138853 | -95.32612189 | -95.53903369   | -95.47646743 | -95.57555352 | -95.51162526 |
| 3.216         | -95.38649955 | -95.32119822 | -95.39151482 | -95.32572347 | -95.53920584   | -95.47607074 | -95.57563485 | -95.51108048 |
| 3.316         | -95.38658571 | -95.32091063 | -95.39160707 | -95.32543194 | -95.53934321   | -95.47579857 | -95.57569593 | -95.51066979 |
| 3.416         | -95.38665218 | -95.32069643 | -95.39167438 | -95.32521738 | -95.53945163   | -95.47561726 | -95.57574323 | -95.51040233 |
| 3.516         | -95.38670104 | -95.32052483 | -95.39172285 | -95.32505882 | -95.53953733   | -95.47549866 | -95.57577762 | -95.51021201 |
| 3.616         | -95.38673283 | -95.32040238 | -95.39175715 | -95.32494121 | -95.53960578   | -95.47542344 | -95.57580602 | -95.51005713 |
| 4.116         | -95.38678295 | -95.32010274 | -95.39181982 | -95.32467450 | -95.53975880   | -95.47531470 | -95.57585323 | -95.50978688 |
| 5.116         | -95.38675685 | -95.31997470 | -95.39181668 | -95.32458725 | -95.53977883   | -95.47530892 | -95.57582701 | -95.50973272 |
| 7.116         | -95.38669729 | -95.31991394 | -95.39179996 | -95.32456772 | -95.53979258   | -95.47532765 | -95.57583749 | -95.50974995 |



## (5) H6-C4-N1-H3 dihedral angle equaling 100°

| $R_{N-H}$ (Å) | MS-CASPT2    |              | XMS-CASPT2   |              | SI-IPBE      |              | SI-ftPBE     |              |
|---------------|--------------|--------------|--------------|--------------|--------------|--------------|--------------|--------------|
|               | E0           | E1           | E0           | E1           | E0           | E1           | E0           | E1           |
| 0.616         | -95.17862633 | -94.97501014 | -95.18293654 | -94.98084683 | -95.33998805 | -95.13332063 | -95.37550934 | -95.16759637 |
| 0.716         | -95.38837670 | -95.18879264 | -95.39278233 | -95.19467154 | -95.54576504 | -95.34137618 | -95.58416502 | -95.38058982 |
| 0.816         | -95.48794397 | -95.29262766 | -95.49249808 | -95.29860173 | -95.64549098 | -95.44581036 | -95.68716806 | -95.48068934 |
| 0.916         | -95.52773084 | -95.33728212 | -95.53246400 | -95.34341940 | -95.68612560 | -95.49199954 | -95.72410412 | -95.53067264 |
| 1.016         | -95.53441246 | -95.35234944 | -95.53994083 | -95.35711920 | -95.69611928 | -95.50448468 | -95.73237213 | -95.54630780 |
| 1.116         | -95.52508826 | -95.35146165 | -95.53012217 | -95.35622075 | -95.68865591 | -95.50656782 | -95.72334276 | -95.54766005 |
| 1.216         | -95.50728086 | -95.34664095 | -95.51118627 | -95.34842381 | -95.67281695 | -95.50497480 | -95.71273978 | -95.54320353 |
| 1.316         | -95.48577326 | -95.34406651 | -95.49217163 | -95.35096639 | -95.65251142 | -95.50422083 | -95.69232583 | -95.54310957 |
| 1.416         | -95.46347259 | -95.34112446 | -95.46822008 | -95.34869630 | -95.62609108 | -95.49843727 | -95.66300765 | -95.54024957 |
| 1.516         | -95.44229371 | -95.34693823 | -95.44702889 | -95.35353445 | -95.60484832 | -95.50179949 | -95.64219388 | -95.54379480 |
| 1.616         | -95.42291841 | -95.35215530 | -95.42767999 | -95.35849694 | -95.58507977 | -95.50586869 | -95.62298586 | -95.54783231 |
| 1.716         | -95.40609491 | -95.35641687 | -95.41098541 | -95.36242605 | -95.56727984 | -95.50944623 | -95.60584730 | -95.55124747 |
| 1.816         | -95.39267554 | -95.35880566 | -95.39788481 | -95.36436012 | -95.55202366 | -95.51171352 | -95.59145021 | -95.55322748 |
| 1.916         | -95.38405488 | -95.35797860 | -95.38974244 | -95.36293017 | -95.54044815 | -95.51165384 | -95.58092651 | -95.55267886 |
| 2.016         | -95.38089989 | -95.35330508 | -95.38672322 | -95.35792104 | -95.53454580 | -95.50848708 | -95.57566781 | -95.54866417 |
| 2.116         | -95.38089608 | -95.34696716 | -95.38647979 | -95.35158004 | -95.53251375 | -95.50289376 | -95.57358965 | -95.54277299 |
| 2.216         | -95.38172975 | -95.34104162 | -95.38712598 | -95.34565206 | -95.53241746 | -95.49659799 | -95.57334408 | -95.53631346 |
| 2.316         | -95.38265301 | -95.33609126 | -95.38794478 | -95.34068430 | -95.53291665 | -95.49088937 | -95.57360072 | -95.53045728 |
| 2.416         | -95.38293880 | -95.33176619 | -95.38870739 | -95.33672323 | -95.53353105 | -95.48617109 | -95.57402287 | -95.52567475 |
| 2.516         | -95.38361820 | -95.32868785 | -95.38935071 | -95.33365310 | -95.53410303 | -95.48245609 | -95.57436805 | -95.52165905 |
| 2.616         | -95.38472093 | -95.32672661 | -95.38986869 | -95.33131777 | -95.53459195 | -95.47961557 | -95.57464808 | -95.51864821 |
| 2.716         | -95.38457933 | -95.32460201 | -95.39027506 | -95.32956484 | -95.53499550 | -95.47749787 | -95.57487712 | -95.51631219 |
| 2.816         | -95.38548053 | -95.32369380 | -95.39058930 | -95.32826152 | -95.53464058 | -95.47883797 | -95.57504230 | -95.51447344 |
| 2.916         | -95.38573721 | -95.32274251 | -95.39082998 | -95.32729923 | -95.53560184 | -95.47484093 | -95.57517347 | -95.51324285 |
| 3.016         | -95.38595103 | -95.32204843 | -95.39101328 | -95.32659183 | -95.53582397 | -95.47405651 | -95.57526967 | -95.51224279 |
| 3.116         | -95.38612603 | -95.32154053 | -95.39115150 | -95.32607369 | -95.53600548 | -95.47351207 | -95.57534989 | -95.51153415 |
| 3.216         | -95.38625650 | -95.32116712 | -95.39125504 | -95.32569413 | -95.53615242 | -95.47313722 | -95.57541110 | -95.51102715 |
| 3.316         | -95.38633283 | -95.32089244 | -95.39133177 | -95.32541570 | -95.53627095 | -95.47288312 | -95.57544248 | -95.51062618 |
| 3.416         | -95.38638727 | -95.32068807 | -95.39138793 | -95.32521075 | -95.53636482 | -95.47271237 | -95.57547366 | -95.51037892 |
| 3.516         | -95.38641988 | -95.32052447 | -95.39142789 | -95.32505980 | -95.53643966 | -95.47260347 | -95.57550368 | -95.51020148 |
| 3.616         | -95.38644270 | -95.32040754 | -95.39145659 | -95.32494731 | -95.53650099 | -95.47253576 | -95.57552666 | -95.51003919 |
| 4.116         | -95.38646011 | -95.32012030 | -95.39150620 | -95.32469353 | -95.53664032 | -95.47243558 | -95.57555121 | -95.50977371 |
| 5.116         | -95.38643829 | -95.31999916 | -95.39149977 | -95.32460981 | -95.53665792 | -95.47242954 | -95.57551977 | -95.50971884 |
| 7.116         | -95.38637676 | -95.31993532 | -95.39148291 | -95.32459032 | -95.53667526 | -95.47245397 | -95.57553570 | -95.50973957 |

## Absolute energies (in a.u.) for the PESs of N-H bond fission near LAC

### (1) N-H3 bond fission of eclipsed conformation

| $R_{N-H}$ (Å) | MS-CASPT2    |              | XMS-CASPT2   |              | SI-IPBE      |              | SI-ftPBE     |              |
|---------------|--------------|--------------|--------------|--------------|--------------|--------------|--------------|--------------|
|               | E0           | E1           | E0           | E1           | E0           | E1           | E0           | E1           |
| 1.922         | -95.38248614 | -95.36938026 | -95.38723337 | -95.37566736 |              |              |              |              |
| 1.932         | -95.38126553 | -95.36973033 | -95.38601705 | -95.37599853 |              |              |              |              |
| 1.942         | -95.38006763 | -95.37007388 | -95.38482248 | -95.37632313 |              |              |              |              |
| 1.952         | -95.37889137 | -95.37041049 | -95.38364950 | -95.37664125 |              |              |              |              |
| 1.962         | -95.37773658 | -95.37074022 | -95.38249796 | -95.37695294 |              |              |              |              |
| 1.972         | -95.37660311 | -95.37106317 | -95.38136768 | -95.37725829 |              |              |              |              |
| 1.982         | -95.37549079 | -95.37137925 | -95.38025850 | -95.37755736 | -95.53496323 | -95.52291839 | -95.57413038 | -95.56452015 |
| 1.992         | -95.37439973 | -95.37168839 | -95.37917025 | -95.37785023 | -95.53374702 | -95.52318821 | -95.57294570 | -95.56476972 |
| 2.002         | -95.37333185 | -95.37199140 | -95.37813816 | -95.37810158 | -95.53255159 | -95.52345306 | -95.57178038 | -95.56501389 |
| 2.012         | -95.37229253 | -95.37228646 | -95.37841782 | -95.37705570 | -95.53137549 | -95.52371333 | -95.57063392 | -95.56525313 |
| 2.022         | -95.37257852 | -95.37125056 | -95.37869260 | -95.37602910 | -95.53021980 | -95.52396833 | -95.56950589 | -95.56548748 |
| 2.032         | -95.37286256 | -95.37024059 | -95.37896154 | -95.37502265 | -95.52908390 | -95.52421819 | -95.56839618 | -95.56571666 |
| 2.042         | -95.37314046 | -95.36925035 | -95.37922470 | -95.37403616 | -95.52796737 | -95.52446289 | -95.56730488 | -95.56594050 |
| 2.052         | -95.37341234 | -95.36827879 | -95.37948217 | -95.37306942 | -95.52686985 | -95.52470274 | -95.56623145 | -95.56615960 |
| 2.062         | -95.37367832 | -95.36732808 | -95.37973403 | -95.37212221 | -95.52579156 | -95.52493776 | -95.56637352 | -95.56517624 |
| 2.072         | -95.37393823 | -95.36639711 | -95.37998038 | -95.37119434 | -95.52516847 | -95.52473224 | -95.56658208 | -95.56413957 |
| 2.082         | -95.37419320 | -95.36548524 | -95.38022130 | -95.37028556 | -95.52539392 | -95.52369236 | -95.56678562 | -95.56312080 |
| 2.092         | -95.37444434 | -95.36459279 | -95.38045687 | -95.36939567 | -95.52561475 | -95.52267192 | -95.56698394 | -95.56211990 |
| 2.102         |              |              |              |              | -95.52583098 | -95.52167077 | -95.56717739 | -95.56113686 |
| 2.112         |              |              |              |              | -95.52604251 | -95.52068888 | -95.56736592 | -95.56017183 |
| 2.122         |              |              |              |              | -95.52624945 | -95.51972567 | -95.56754959 | -95.55922498 |
| 2.132         |              |              |              |              | -95.52645197 | -95.51878124 | -95.56772845 | -95.55829679 |
| 2.142         |              |              |              |              | -95.52665011 | -95.51785562 | -95.56790301 | -95.55738670 |
| 2.152         |              |              |              |              | -95.52684400 | -95.51694823 | -95.56807402 | -95.55649383 |

## (2) N-H2 bond fission of eclipsed conformation

| R <sub>N-H</sub> (Å) | MS-CASPT2    |              | XMS-CASPT2   |              | SI-IPBE      |              | SI-rIPBE     |              |
|----------------------|--------------|--------------|--------------|--------------|--------------|--------------|--------------|--------------|
|                      | E0           | E1           | E0           | E1           | E0           | E1           | E0           | E1           |
| 1.973                | -95.37811027 | -95.36717800 | -95.38287122 | -95.37338043 |              |              |              |              |
| 1.983                | -95.37700357 | -95.36749595 | -95.38176617 | -95.37368113 |              |              |              |              |
| 1.993                | -95.37591571 | -95.36780708 | -95.38068172 | -95.37397559 |              |              |              |              |
| 2.003                | -95.37485261 | -95.36811188 | -95.37961766 | -95.37426388 |              |              |              |              |
| 2.013                | -95.37380058 | -95.36841001 | -95.37857381 | -95.37454610 |              |              |              |              |
| 2.023                | -95.37277295 | -95.36870185 | -95.37754998 | -95.37482233 | -95.53158673 | -95.52034034 | -95.57087319 | -95.56186218 |
| 2.033                | -95.37176536 | -95.36898742 | -95.37654600 | -95.37509266 | -95.53045359 | -95.52059034 | -95.56976672 | -95.56209130 |
| 2.043                | -95.37077692 | -95.36926679 | -95.37556180 | -95.37535703 | -95.52933943 | -95.52083459 | -95.56867745 | -95.56231518 |
| 2.053                | -95.36980846 | -95.36954004 | -95.37561604 | -95.37459666 | -95.52824450 | -95.52107477 | -95.56760670 | -95.56253440 |
| 2.063                | -95.36980749 | -95.36885838 | -95.37586919 | -95.37365099 | -95.52716859 | -95.52130927 | -95.56655293 | -95.56274756 |
| 2.073                | -95.37006894 | -95.36792826 | -95.37611680 | -95.37272434 | -95.52611087 | -95.52153916 | -95.56551631 | -95.56295706 |
| 2.083                | -95.37032462 | -95.36701708 | -95.37635896 | -95.37181650 | -95.52507340 | -95.52176468 | -95.56449714 | -95.56316076 |
| 2.093                | -95.37057383 | -95.36612462 | -95.37659576 | -95.37092725 | -95.52405452 | -95.52198467 | -95.56349766 | -95.56335677 |
| 2.103                | -95.37081820 | -95.36525072 | -95.37682727 | -95.37005638 | -95.52305441 | -95.52220035 | -95.56355277 | -95.56250988 |
| 2.113                | -95.37105724 | -95.36439505 | -95.37705361 | -95.36920368 | -95.52241248 | -95.52207203 | -95.56374156 | -95.56154258 |
| 2.123                | -95.37129103 | -95.36355743 | -95.37727484 | -95.36836890 | -95.52261830 | -95.52110936 | -95.56392543 | -95.56059246 |
| 2.133                | -95.37151961 | -95.36273776 | -95.37749106 | -95.36755184 | -95.52282054 | -95.52016454 | -95.56410483 | -95.55966180 |
| 2.143                | -95.37174489 | -95.36193566 | -95.37770237 | -95.36675225 | -95.52301843 | -95.51923881 | -95.56427880 | -95.55874990 |
| 2.153                | -95.37197436 | -95.36115242 | -95.37790884 | -95.36596990 | -95.52321156 | -95.51833108 | -95.56444999 | -95.55785601 |
| 2.163                |              |              |              |              | -95.52340139 | -95.51744049 | -95.56461798 | -95.55697900 |
| 2.173                |              |              |              |              | -95.52358603 | -95.51656774 | -95.56478289 | -95.55611883 |
| 2.183                |              |              |              |              | -95.52376664 | -95.51571263 | -95.56494335 | -95.55527395 |
| 2.193                |              |              |              |              | -95.52394316 | -95.51487432 | -95.56510033 | -95.55444348 |
| 2.203                |              |              |              |              | -95.52411636 | -95.51405221 | -95.56525313 | -95.55362640 |
| 2.213                |              |              |              |              | -95.52428488 | -95.51324755 | -95.56540218 | -95.55282166 |
| 2.223                |              |              |              |              | -95.52444981 | -95.51246048 | -95.56554616 | -95.55202960 |
| 2.233                |              |              |              |              | -95.52461126 | -95.51169049 | -95.56568576 | -95.55125020 |
| 2.243                |              |              |              |              | -95.52476891 | -95.51093687 | -95.56582071 | -95.55048436 |

## (3) staggered conformation

| R <sub>N-H</sub> (Å) | MS-CASPT2    |              | XMS-CASPT2   |              | SI-tPBE      |              | SI-ftPBE     |              |
|----------------------|--------------|--------------|--------------|--------------|--------------|--------------|--------------|--------------|
|                      | E0           | E1           | E0           | E1           | E0           | E1           | E0           | E1           |
| 1.836                | -95.38218459 | -95.36718135 | -95.38292900 | -95.36711510 |              |              |              |              |
| 1.846                | -95.38088666 | -95.36749930 | -95.38164420 | -95.36743470 |              |              |              |              |
| 1.856                | -95.37963659 | -95.36778663 | -95.38041600 | -95.36771260 |              |              |              |              |
| 1.866                | -95.37844303 | -95.36803276 | -95.37925600 | -95.36793710 |              |              |              |              |
| 1.876                | -95.37730728 | -95.36821857 | -95.37818070 | -95.36809160 | -95.53738813 | -95.51937804 | -95.57803901 | -95.56031275 |
| 1.886                | -95.37627211 | -95.36832947 | -95.37721220 | -95.36815400 | -95.53622562 | -95.51953620 | -95.57699337 | -95.56036482 |
| 1.896                | -95.37534902 | -95.36834018 | -95.37637780 | -95.36809720 | -95.53513275 | -95.51971862 | -95.57594715 | -95.56045047 |
| 1.906                | -95.37457510 | -95.36822369 | -95.37570500 | -95.36789340 | -95.53409286 | -95.51992090 | -95.57489796 | -95.56056567 |
| 1.916                | -95.37396231 | -95.36794809 | -95.37521190 | -95.36752470 | -95.53309245 | -95.52012491 | -95.57385612 | -95.56068605 |
| 1.926                | -95.37352752 | -95.36750656 | -95.37489670 | -95.36699260 | -95.53212838 | -95.52030225 | -95.57284616 | -95.56077627 |
| 1.936                | -95.37326101 | -95.36690996 | -95.37473770 | -95.36631900 | -95.53121012 | -95.52042044 | -95.57190471 | -95.56079966 |
| 1.946                | -95.37313189 | -95.36617983 | -95.37470190 | -95.36553660 | -95.53035861 | -95.52044967 | -95.57106440 | -95.56072073 |
| 1.956                | -95.37312550 | -95.36534106 | -95.37475680 | -95.36467820 | -95.52960014 | -95.52036390 | -95.57035424 | -95.56051487 |
| 1.966                | -95.37323436 | -95.36441305 | -95.37487570 | -95.36377010 | -95.52896059 | -95.52014248 | -95.56979031 | -95.56016664 |
| 1.976                | -95.37345438 | -95.36340266 | -95.37503880 | -95.36283210 | -95.52845689 | -95.51977488 | -95.56937252 | -95.55967599 |
| 1.986                | -95.37375001 | -95.36232819 | -95.37523240 | -95.36187800 | -95.52809203 | -95.51926590 | -95.56908892 | -95.55905679 |
| 1.996                |              |              |              |              | -95.52785526 | -95.51862965 | -95.56891676 | -95.55833097 |
| 2.006                |              |              |              |              | -95.52772581 | -95.51789074 | -95.56883226 | -95.55752363 |
| 2.016                |              |              |              |              | -95.52768096 | -95.51707390 | -95.56881424 | -95.55665736 |
| 2.026                |              |              |              |              | -95.52769913 | -95.51620287 | -95.56884495 | -95.55575236 |
| 2.036                |              |              |              |              | -95.52776440 | -95.51529541 | -95.56891217 | -95.55482326 |
| 2.046                |              |              |              |              | -95.52786365 | -95.51436544 | -95.56900713 | -95.55388136 |
| 2.056                |              |              |              |              | -95.52798694 | -95.51342323 | -95.56912284 | -95.55293504 |
| 2.066                |              |              |              |              | -95.52812836 | -95.51247635 | -95.56925391 | -95.55199037 |

## (4) H6-C4-N1-H3 dihedral angle equaling 95°

| $R_{N-H}$ (Å) | MS-CASPT2    |              | XMS-CASPT2   |              | SI-IPBE      |              | SI-ftPBE     |              |
|---------------|--------------|--------------|--------------|--------------|--------------|--------------|--------------|--------------|
|               | E0           | E1           | E0           | E1           | E0           | E1           | E0           | E1           |
| 1.836         | -95.38348044 | -95.36542479 | -95.38870850 | -95.37140473 |              |              |              |              |
| 1.846         | -95.38226985 | -95.36565370 | -95.38758026 | -95.37154411 |              |              |              |              |
| 1.856         | -95.38111671 | -95.36583876 | -95.38652554 | -95.37162571 |              |              |              |              |
| 1.866         | -95.38002816 | -95.36597501 | -95.38555443 | -95.37163936 |              |              |              |              |
| 1.876         | -95.37901306 | -95.36604900 | -95.38467779 | -95.37157416 | -95.53875046 | -95.51775632 | -95.57943235 | -95.55861592 |
| 1.886         | -95.37808185 | -95.36605250 | -95.38390613 | -95.37141956 | -95.53749275 | -95.51787203 | -95.57828685 | -95.55865281 |
| 1.896         | -95.37724595 | -95.36597418 | -95.38324790 | -95.37116705 | -95.53629356 | -95.51797816 | -95.57717570 | -95.55867896 |
| 1.906         | -95.37651628 | -95.36580265 | -95.38270751 | -95.37081216 | -95.53515862 | -95.51807321 | -95.57610474 | -95.55869001 |
| 1.916         | -95.37590155 | -95.36553383 | -95.38228391 | -95.37035588 | -95.53409373 | -95.51814942 | -95.57508186 | -95.55867885 |
| 1.926         | -95.37540261 | -95.36515452 | -95.38197030 | -95.36980493 | -95.53310559 | -95.51819537 | -95.57411981 | -95.55863318 |
| 1.936         | -95.37502464 | -95.36467450 | -95.38175537 | -95.36917057 | -95.53219771 | -95.51819608 | -95.57323251 | -95.55853872 |
| 1.946         | -95.37476171 | -95.36409334 | -95.38162525 | -95.36846657 | -95.53137820 | -95.51813628 | -95.57243427 | -95.55838048 |
| 1.956         | -95.37462238 | -95.36342331 | -95.38156561 | -95.36770719 | -95.53065321 | -95.51800057 | -95.57173571 | -95.55814590 |
| 1.966         | -95.37456571 | -95.36266659 | -95.38156310 | -95.36690568 | -95.53002938 | -95.51777642 | -95.57114287 | -95.55782521 |
| 1.976         | -95.37460410 | -95.36183991 | -95.38160609 | -95.36607359 | -95.52950990 | -95.51745671 | -95.57065733 | -95.55741412 |
| 1.986         | -95.37473059 | -95.36096855 | -95.38168487 | -95.36522051 | -95.52909453 | -95.51704054 | -95.57027500 | -95.55691448 |
| 1.996         | -95.37491210 | -95.36004905 | -95.38179157 | -95.36435422 | -95.52877714 | -95.51653149 | -95.56998635 | -95.55633285 |
| 2.006         | -95.37514182 | -95.35909770 | -95.38191991 | -95.36348090 | -95.52854884 | -95.51593900 | -95.56977909 | -95.55567951 |
| 2.016         | -95.37539600 | -95.35814307 | -95.38206490 | -95.36260530 | -95.52839755 | -95.51527483 | -95.56963977 | -95.55496608 |
| 2.026         | -95.37566331 | -95.35719299 | -95.38222250 | -95.36173160 | -95.52831061 | -95.51455234 | -95.56955625 | -95.55420465 |
| 2.036         |              |              |              |              | -95.52827772 | -95.51378372 | -95.56951983 | -95.55340592 |
| 2.046         |              |              |              |              | -95.52828706 | -95.51298091 | -95.56952082 | -95.55258049 |
| 2.056         |              |              |              |              | -95.52833018 | -95.51215269 | -95.56955224 | -95.55173658 |
| 2.066         |              |              |              |              | -95.52839951 | -95.51130754 | -95.56960804 | -95.55088208 |
| 2.076         |              |              |              |              | -95.52848958 | -95.51045220 | -95.56968297 | -95.55002287 |
| 2.086         |              |              |              |              | -95.52859627 | -95.50959195 | -95.56977325 | -95.54916338 |

## (5) H6-C4-N1-H3 dihedral angle equaling 100°

| $R_{N-H}$ (Å) | MS-CASPT2    |              | XMS-CASPT2   |              | SI-IPBE      |              | SI-ftPBE     |              |
|---------------|--------------|--------------|--------------|--------------|--------------|--------------|--------------|--------------|
|               | E0           | E1           | E0           | E1           | E0           | E1           | E0           | E1           |
| 1.836         | -95.39030921 | -95.35847158 | -95.39581499 | -95.36438859 |              |              |              |              |
| 1.846         | -95.38929559 | -95.35849656 | -95.39485939 | -95.36434754 |              |              |              |              |
| 1.856         | -95.38833417 | -95.35848467 | -95.39395855 | -95.36426761 |              |              |              |              |
| 1.866         | -95.38741389 | -95.35843391 | -95.39311358 | -95.36414764 | -95.54585052 | -95.51179756 | -95.58627504 | -95.55281861 |
| 1.876         | -95.38656374 | -95.35834396 | -95.39232534 | -95.36398676 | -95.54473396 | -95.51178348 | -95.58524878 | -95.55274766 |
| 1.886         | -95.38577030 | -95.35821234 | -95.39159429 | -95.36378443 | -95.54366609 | -95.51174226 | -95.58426631 | -95.55264902 |
| 1.896         | -95.38503457 | -95.35803878 | -95.39092048 | -95.36354056 | -95.54264842 | -95.51167480 | -95.58332835 | -95.55252260 |
| 1.906         | -95.38435821 | -95.35782735 | -95.39030348 | -95.36325549 | -95.54168258 | -95.51157777 | -95.58243555 | -95.55236796 |
| 1.916         | -95.38374267 | -95.35756834 | -95.38974248 | -95.36293012 | -95.54076877 | -95.51145384 | -95.58158893 | -95.55218474 |
| 1.926         | -95.38318676 | -95.35726625 | -95.38923582 | -95.36256561 | -95.53990901 | -95.51129918 | -95.58078805 | -95.55197172 |
| 1.936         | -95.38268567 | -95.35692384 | -95.38878190 | -95.36216391 | -95.53910237 | -95.51111534 | -95.58003343 | -95.55172762 |
| 1.946         | -95.38223726 | -95.35654134 | -95.38837837 | -95.36172713 | -95.53834978 | -95.51089974 | -95.57932446 | -95.55145207 |
| 1.956         | -95.38183752 | -95.35612090 | -95.38802262 | -95.36125780 | -95.53765153 | -95.51065206 | -95.57866248 | -95.55114525 |
| 1.966         | -95.38149312 | -95.35566625 | -95.38771179 | -95.36075869 | -95.53700686 | -95.51037195 | -95.57804687 | -95.55080679 |
| 1.976         | -95.38120278 | -95.35517901 | -95.38744283 | -95.36023274 | -95.53641469 | -95.51005934 | -95.57747881 | -95.55043675 |
| 1.986         | -95.38095783 | -95.35466196 | -95.38721261 | -95.35968299 | -95.53587403 | -95.50971426 | -95.57695757 | -95.55003646 |
| 1.996         | -95.38074875 | -95.35411822 | -95.38701798 | -95.35911247 | -95.53538344 | -95.50933692 | -95.57648264 | -95.54960691 |
| 2.006         | -95.38057991 | -95.35356259 | -95.38685583 | -95.35852417 | -95.53494000 | -95.50892806 | -95.57605329 | -95.54914909 |
| 2.016         | -95.38044717 | -95.35297652 | -95.38672318 | -95.35792098 | -95.53454250 | -95.50849060 | -95.57566790 | -95.54866584 |
| 2.026         | -95.38034807 | -95.35237179 | -95.38661717 | -95.35730562 | -95.53418830 | -95.50802150 | -95.57532325 | -95.54815618 |
| 2.036         | -95.38027785 | -95.35175302 | -95.38653510 | -95.35668067 | -95.53387466 | -95.50752911 | -95.57501671 | -95.54762327 |
| 2.046         | -95.38023223 | -95.35112501 | -95.38647447 | -95.35604849 | -95.53359875 | -95.50700901 | -95.57474414 | -95.54706707 |
| 2.056         | -95.38020703 | -95.35048908 | -95.38643298 | -95.35541126 | -95.53335899 | -95.50646827 | -95.57450445 | -95.54649274 |
| 2.066         | -95.38020142 | -95.34984777 | -95.38640850 | -95.35477096 | -95.53315151 | -95.50590770 | -95.57429294 | -95.54590127 |
| 2.076         | -95.38021213 | -95.34920311 | -95.38639910 | -95.35412939 | -95.53297425 | -95.50532980 | -95.57410779 | -95.54529486 |
| 2.086         | -95.38023762 | -95.34855975 | -95.38640304 | -95.35348815 | -95.53282407 | -95.50473716 | -95.57394644 | -95.54467635 |
| 2.096         | -95.38027589 | -95.34791869 | -95.38641872 | -95.35284867 | -95.53269877 | -95.50413201 | -95.57380726 | -95.54404831 |
| 2.106         | -95.38032494 | -95.34728084 | -95.38644473 | -95.35221223 | -95.53259577 | -95.50351693 | -95.57368843 | -95.54341316 |
| 2.116         |              |              |              |              | -95.53251306 | -95.50289391 | -95.57358912 | -95.54277293 |
| 2.126         |              |              |              |              | -95.53244872 | -95.50226490 | -95.57350850 | -95.54212929 |
| 2.136         |              |              |              |              | -95.53240010 | -95.50163155 | -95.57344573 | -95.54148355 |

## Natural orbitals of SA-CASSCF calculations with equilibrium geometry (only active orbitals are shown)

### (1) eclipsed conformation

#### \* ORBITAL 1 7

9.55481545851503E-02 -2.15572136627055E-01 -2.28967218586476E-01 5.59669685726644E-02 -9.11534272276254E-04  
 -3.84445188844512E-04 1.12576902260415E-03 -9.74663359873427E-08 1.56790561449910E-06 3.70631763977641E-07  
 4.29372779483094E-01 2.42457526602965E-01 -3.64459853889286E-02 -1.00114559577660E-07 -9.48571104302540E-07  
 -2.02160994029975E-02 7.32968892032582E-04 4.88276260731508E-03 5.66656185795388E-02 4.67543105515929E-02  
 2.41261262249070E-02 -3.39728432708932E-03 2.65951377701836E-07 5.61033833399816E-03 5.62551562557934E-02  
 4.43099691782894E-02 2.55596855422946E-02 3.57932795045290E-03 2.69857862072923E-07 5.52629674333058E-03  
 5.68520814834723E-02 -1.19944609505252E-01 5.32952515337700E-03 -7.66864021484878E-02 -1.08157040130127E-02  
 -6.06615476362318E-03 -3.71944845556400E-03 -1.56623995857290E-05 -4.91500071100468E-06 2.91440485242595E-06  
 -3.60325270295304E-01 -9.70203129670936E-02 -3.43926684085835E-02 -1.28169690182813E-06 1.54263710429824E-06  
 -3.67152388965471E-02 -4.39337759465620E-04 3.34220692384300E-04 4.25959262307501E-02 3.74615039026584E-02  
 3.98013289626493E-03 -8.26868365069269E-04 1.23031416798564E-03 -3.68240442704115E-03 4.40117888899710E-02  
 4.10319011119433E-02 -3.93800988241914E-03 1.00251783012962E-03 -7.04548145768688E-07 -3.62387081315814E-03  
 4.25695967387177E-02 3.74387294603196E-02 3.97443811796087E-03 -8.26632755708346E-04 -1.22885868486675E-03  
 -3.68304609863649E-03

#### \* ORBITAL 1 8

1.18069860722597E-05 -3.91649538230648E-05 -1.86117446295831E-05 1.55780274778675E-05 -9.14036852441189E-08  
 6.09544020526067E-07 2.43940840592836E-06 -6.00128105402143E-01 -4.66720827773001E-01 -1.31264183500111E-01  
 -1.17559537536028E-05 -3.37334552003520E-06 -1.42216083881822E-05 1.17985315348957E-03 5.66866092181322E-05  
 1.26496956428026E-06 1.80213764341074E-08 3.34876888898622E-06 7.94666996779449E-06 -3.40074665986128E-06  
 2.17557463048116E-06 -7.93711480978145E-07 -1.85734670920755E-02 -8.56179244770280E-07 7.77364020456519E-06  
 -1.01854698125097E-06 4.64080798787653E-06 7.47842455965309E-07 -1.88323130197707E-02 -8.99916394958748E-07  
 -7.49174879828376E-07 1.66508014917732E-06 1.70641307733719E-06 -1.58802216494838E-05 -3.60525703502979E-07  
 -1.38367812071162E-06 -4.83010776038923E-06 1.03821694841433E-01 7.42420739019572E-02 3.63966799139542E-02  
 1.37040481577362E-06 -5.12791063269798E-06 -6.14511907977196E-06 1.09309888293599E-02 -3.32548385284702E-02  
 -1.04892746773502E-06 -4.68453759240540E-08 9.77450982664863E-06 -1.05146561199124E-01 -1.49295002039088E-01  
 -9.48943717945166E-03 2.10664705906309E-03 -1.89520057693280E-03 -4.55984586718798E-04 3.63404082639786E-05  
 4.47965974048959E-05 -3.55548704362414E-06 1.57295473875939E-06 1.98938895582040E-03 3.90537692374815E-08  
 1.05112012219350E-01 1.49236880485105E-01 9.49297526198977E-03 -2.10828362678281E-03 -1.89308980909284E-03  
 4.55625203089270E-04

#### \* ORBITAL 1 9

9.82356001846593E-05 -5.63287274457070E-04 -7.20757478679694E-05 9.79194176498762E-06 -5.81686869305776E-06  
 7.15121341818313E-06 6.96675505002170E-06 8.55560360683011E-01 -5.66411335525909E-01 -5.83414474554775E-01  
 1.56407078443590E-03 -4.95803310502909E-05 -7.00211491919380E-05 -4.70100435122719E-04 -2.99067601746367E-02  
 -2.34959059035082E-04 5.44847445079532E-08 -9.14337925848101E-05 -1.06143840316645E-04 -2.74790832771591E-04  
 7.07402004291846E-05 -1.82415701239280E-06 -1.77853397069055E-02 1.31942808385273E-05 -1.02416187170050E-04  
 -2.57583759520885E-04 6.84127240410402E-05 2.25250750957656E-06 -1.86621679349035E-02 1.25913769188804E-05  
 -1.68093417479946E-04 5.75902858024100E-04 4.65858653641385E-04 -1.16554902099652E-04 2.88277340217935E-05  
 -7.50490803334649E-06 -4.38126179388060E-06 -1.12466818716441E-01 -1.32792670063972E-01 2.34784692536648E-01  
 1.08217150965888E-03 4.44156556876984E-04 2.27200876528556E-05 8.90710173639262E-03 -7.21691076723097E-02  
 9.82101469102196E-05 6.26897317914106E-06 -6.21028721018565E-06 -8.75500061356073E-02 -3.19853487088098E-01  
 7.16208432674002E-02 4.82010480789593E-04 9.52994127601759E-04 1.07230677498025E-02 2.83956112960141E-06  
 -1.83749351352586E-06 1.00846885448696E-05 4.26622325911939E-06 1.74730460690355E-03 9.76432318141878E-06  
 8.74285196611145E-02 3.19574347049566E-01 -7.15228604847774E-02 -4.78710657699679E-04 9.55470314609926E-04  
 -1.06813420728430E-02

#### \* ORBITAL 1 10

2.50213331426640E-04 -5.88870408059672E-04 -6.11769524962638E-04 1.00652589542874E-04 -2.62238708161195E-07  
 1.01513808591635E-06 1.48303132585123E-06 -1.49780375625341E-01 -7.44538055949973E-02 -2.99899171161392E-03  
 -4.01844087698008E-04 -1.92127867326865E-04 -1.26045990675986E-05 -1.32922381170625E-03 1.24125808500901E-02  
 4.79663460342482E-06 1.41644039969335E-07 -2.19567543487186E-05 -2.99492991087831E-04 -6.85554785090252E-05  
 -1.81166168759947E-05 3.19955492842914E-05 -4.01323012671879E-03 1.18794072020780E-05 -2.99763153638134E-04  
 -6.62577430887228E-05 -1.81066601216121E-05 -3.18448419681621E-05 -4.31263473320112E-03 1.18358006506530E-05  
 -3.84010659179830E-05 8.88296979357027E-05 1.21581082026402E-04 -6.81092105771634E-05 -4.01139539325363E-06  
 -4.52228612791591E-06 -2.12838777317580E-06 -4.33353292725904E-01 -2.13286211888140E-01 1.06804413254203E-02

2.39505124319850E-05 3.50018768793855E-05 -1.39213132662513E-05 -2.20811977897360E-02 1.04803552607817E-02  
-5.29533080849701E-06 1.77549663148956E-07 -1.92504122054233E-05 2.24655530555013E-01 1.68819344913171E-01  
2.77404402957439E-02 -6.87396029297253E-03 6.31155943446853E-03 5.95642458723732E-03 -5.16653568570718E-05  
-6.22842497834464E-05 -2.62042971977079E-06 -3.50712047999069E-06 -6.78947020573713E-03 -5.83818592367717E-07  
-2.24542809931495E-01 -1.68766759219436E-01 -2.77133067919515E-02 6.87792227084634E-03 6.30089835858046E-03  
-5.95174974598638E-03

\* ORBITAL 1 11

8.70288433809271E-02 -5.71143836204871E-01 -8.35803083932215E-03 -8.63746595727339E-03 -3.59824332382553E-03  
3.07446251909810E-03 3.84726790081557E-03 -1.42376531696594E-03 9.64097943195651E-04 9.65818569271137E-04  
7.93371781095499E-01 -5.21412272161878E-03 2.47733297690106E-02 2.87990255870923E-07 1.25844372963163E-04  
-7.26971271236172E-02 2.44813010547474E-04 4.71427134046297E-02 3.37417103636617E-03 -4.45097440923715E-02  
-6.54927760187786E-02 1.01304420696008E-03 3.31280511882836E-05 8.28793265919311E-03 5.37365508488086E-03  
-3.66796858231475E-02 -6.51736303684358E-02 -8.18069792651366E-04 3.45756311517879E-05 7.84980452196849E-03  
-1.02081397390383E-01 3.28654063482053E-01 3.15055463922876E-01 1.63201898090504E-01 1.66787272342168E-02  
-3.27088006418067E-03 -7.31371327446370E-03 1.47978761855874E-04 2.13238371746284E-04 -3.78831372770733E-04  
6.39231461097952E-01 2.68015852114565E-01 8.30423230110666E-03 -1.58370126600049E-05 1.01384077521926E-04  
5.96642734269202E-02 3.20554578220991E-03 -7.29980284658140E-03 -2.74855710375902E-02 -5.35909206444786E-02  
-2.93338393827131E-02 3.97625406354940E-04 -4.22917744182477E-04 1.00840422456068E-02 -2.24178113946073E-02  
-6.65695072903300E-02 -3.78529571828359E-02 2.22299423615532E-03 -2.18208700828683E-06 8.04436905680722E-03  
-2.77538997946903E-02 -5.46142202109291E-02 -2.91139647107907E-02 3.98885606371730E-04 4.19656593219469E-04  
1.01178100395092E-02

\* ORBITAL 1 12

-5.11545096048618E-02 1.16773483966790E-01 4.59706988450946E-01 4.02983944117625E-01 7.39344694662009E-04  
-1.05900955705109E-03 -2.28265351412623E-03 -3.17952762834142E-06 -2.15501093473174E-05 -1.44801459882944E-05  
8.27538912402744E-02 8.99655037303711E-02 2.66849953707954E-01 1.66790355843138E-08 -5.02175271020471E-06  
9.14045411870767E-03 7.49623843264804E-04 7.20477785852624E-03 -9.97279514747419E-03 -1.95584768077190E-01  
-7.98718258008838E-01 -8.90116691796095E-03 -4.70920080863182E-07 -2.66062806910544E-03 -1.35136566854264E-02  
-2.09896080271528E-01 -8.00329030813052E-01 8.82015760378993E-03 -4.85849695388059E-07 -2.73865866261071E-03  
-1.74863872058294E-02 4.11657877090571E-02 1.69609494485683E-01 1.22249244552399E+00 -8.88331673928710E-03  
-1.64844966594625E-02 -1.84470420171622E-02 1.00384771917240E-05 2.98002915979050E-05 2.16377446817623E-05  
-7.67692563937602E-02 -1.12377430941806E-01 -7.24973407902059E-02 3.26374795438661E-07 1.55450859346384E-06  
4.30983854193601E-03 -4.20711124559795E-04 -8.00104313781696E-04 5.19151970728860E-03 -4.80302153672186E-02  
-3.12876039338459E-01 -2.06798716454827E-03 2.82081642620815E-03 -2.13177846894923E-03 8.88582987171096E-04  
-6.76330554561199E-02 -3.20281805651963E-01 3.87384203814294E-03 -1.06151112447937E-06 -2.42688643788028E-03  
5.18983011733478E-03 -4.80622863681882E-02 -3.12917010759868E-01 -2.06989930299310E-03 -2.81972328860733E-03  
-2.13141641844759E-03



## (2) staggered conformation

## \* ORBITAL 1 7

-2.17417276415334E-03 4.79106163714713E-03 4.85412006041552E-03 -7.19248849571914E-04 -1.07068786401355E-03  
 -6.03472709134212E-04 2.28424790647834E-05 -4.89468736572232E-01 -2.71287388151457E-01 -5.73679659744382E-04  
 5.86280308697217E-03 3.19878845700295E-03 -8.62793418117858E-05 -1.43208456284306E-07 -1.49194791683971E-02  
 -2.53489806132678E-04 1.09668138587008E-05 -2.57975621179516E-04 2.49086761984328E-01 9.60164017768770E-02  
 1.81573307873742E-02 5.98338344418246E-04 1.42604920427358E-02 -8.68975622241582E-03 -2.43094788199239E-01  
 -9.33279431472493E-02 -1.73850294348236E-02 -5.73973995694202E-04 1.36786251297751E-02 8.73634582848497E-03  
 5.03479123641112E-04 -1.10140281741977E-03 -1.11973272148634E-03 1.46994969171392E-04 1.93285211398371E-04  
 1.31014832299729E-04 -8.72459242411573E-05 2.55881239321531E-02 4.28802529850926E-02 -1.31271274209677E-03  
 -2.34797361267957E-03 -1.14817925708010E-03 -9.69314555389786E-05 -1.80823224031363E-03 -1.47072932637512E-02  
 -1.17250594314685E-04 -4.60755486869011E-06 8.40659024060704E-06 3.11855847720721E-02 3.65832059620334E-02  
 1.02026022170778E-02 5.72463697487221E-04 -6.26421938698587E-04 9.82998221876725E-04 2.79649441548230E-04  
 3.97085141737483E-04 6.60607102874003E-05 -1.08288443602282E-05 4.11955526591106E-04 -2.45907229381410E-05  
 -3.09329114853617E-02 -3.59840283901573E-02 -1.05236318361013E-02 -5.65877873680030E-04 -6.22333095621586E-04  
 -1.04327550550558E-03

## \* ORBITAL 1 8

1.36812126747685E-01 -3.01119222396724E-01 -2.89984841076805E-01 4.31265095485872E-02 2.96693818414352E-02  
 1.66066604786443E-02 -1.40942628857006E-03 -7.93291576827474E-03 -4.19937295958775E-03 -4.04734971254632E-05  
 -3.64130484124159E-01 -1.93991964777280E-01 5.18222318795841E-03 -3.81319615213463E-05 -2.50659747340386E-04  
 1.60503669146136E-02 -1.71065779633352E-03 1.66001435975987E-02 -1.86280463637457E-01 -7.47576935529455E-02  
 -2.15598519867940E-02 2.10172229388151E-04 -1.73741949149887E-02 -1.04364874570374E-03 -1.94400678718806E-01  
 -7.76642795071469E-02 -2.20459211942921E-02 2.33424158465034E-04 1.78274118486854E-02 -7.65093163173317E-04  
 -3.13058987101422E-02 6.82547654971604E-02 6.33146714591197E-02 -1.18572475161942E-02 -1.085200901172243E-02  
 -4.39785398505140E-03 4.79996395426833E-03 4.48767964643727E-04 6.64280759830774E-04 1.32796008291285E-05  
 1.47611209639534E-01 6.93821585974878E-02 6.00636983644245E-03 -2.83265923957766E-05 -2.21234644558574E-04  
 7.99117585853319E-03 -8.40233381361620E-04 2.73425361874128E-04 -9.66899717853317E-03 -1.89171584930362E-02  
 9.25093262503099E-03 -1.87855324592963E-04 2.05639346078992E-04 1.91832971815352E-03 -1.44558742159283E-02  
 -2.06384055227099E-02 -1.73896589414087E-03 6.00557174150581E-04 7.75587654081493E-06 1.63971614497920E-03  
 -1.06274361449038E-02 -2.00247127374456E-02 9.01990164169578E-03 -2.05168377008856E-04 -2.23192477330079E-04  
 1.88227642962764E-03

## \* ORBITAL 1 9

3.73222973324128E-03 -8.75511558600245E-03 -2.07534435435241E-02 -2.19041755412830E-02 6.06154561215013E-01  
 4.88136151694296E-01 8.11129566506977E-02 -7.23163985491766E-04 -5.81463512506635E-04 -1.00174707586439E-04  
 5.67926821761580E-02 4.62065092118075E-02 1.03212633633710E-02 1.28761602309827E-05 4.28190413917846E-07  
 -5.84293050837698E-04 -2.39372834275857E-03 -7.83840300075087E-04 3.78000471381852E-03 8.47817747666064E-03  
 -8.63730683389572E-04 1.85947361326213E-02 2.57239856547475E-07 1.41678732276898E-03 3.76473777666179E-03  
 8.45886877303874E-03 -8.54480031034819E-04 1.86344970435229E-02 -4.42127165777369E-05 1.42057052954575E-03  
 -1.26873337938952E-03 5.69944103114668E-04 1.48731278303390E-02 3.98264439922736E-02 -8.83989175879420E-02  
 -6.88999766704759E-02 -1.61628175631672E-02 1.36831953058428E-04 1.05885262258494E-04 4.48117426221635E-05  
 -6.40628617364428E-03 -4.06152221434690E-03 -3.41650611959282E-05 -1.26632615604524E-05 -3.93904279895511E-05  
 2.72212628213087E-03 3.00313926108749E-02 -1.17784664182608E-02 5.45644984970135E-02 6.91702869985075E-02  
 7.10088228058777E-04 -5.24533005626028E-04 -2.08119663702478E-03 1.75854207619474E-04 -1.03610367943625E-01  
 -1.46705543340501E-01 -2.32197132342347E-02 2.39597989000409E-03 5.90568297741201E-06 -7.60478090849764E-04  
 5.42403737448567E-02 6.87202766362776E-02 7.03324428265844E-04 -5.34523322863270E-04 2.07448918434702E-03  
 1.72109736512026E-04

## \* ORBITAL 1 10

6.14318786244162E-02 -1.44848426088799E-01 -5.41787092995262E-01 -4.91536501503599E-01 2.79391109844154E-03  
 -7.42602942787550E-04 -7.52009289273792E-03 5.72920056340372E-04 7.68327702787451E-04 2.28025935806235E-04  
 -1.03132933857170E-01 -1.01015425871302E-01 -2.78910347418369E-01 -5.22450129600121E-06 -3.62002397966245E-05  
 -8.93479612143627E-03 1.08429618977569E-03 4.00351278765490E-03 4.11801201337217E-02 3.02449138360337E-01  
 8.27240389960863E-01 -2.79080278122337E-04 -1.04540972961990E-02 -4.55857106038954E-04 4.09020601929077E-02  
 3.01081654725914E-01 8.24019011676304E-01 -2.51514272444181E-04 1.04133065537053E-02 -4.86856965768870E-04  
 1.83418596824660E-02 -4.25084493726255E-02 -1.69084792815777E-01 -1.10406569276555E+00 8.66380559622644E-03  
 2.38722744425845E-02 8.95932457732216E-02 1.68125345710708E-04 2.50121701927593E-04 3.78163109451101E-04  
 7.13852161800908E-02 1.07576320546678E-01 6.02339171070630E-02 3.31111377862973E-06 2.16256480629959E-05  
 -4.76972283018770E-03 4.55180387616690E-04 -2.01121914376131E-03 -2.56332212115707E-03 6.11442608251221E-02  
 3.09730349090532E-01 -1.43798010904323E-03 3.79830981879203E-03 2.52541079473883E-03 -6.88728067275828E-03  
 1.82213258944008E-02 1.31990565373782E-01 3.14892279175547E-03 4.62882785605202E-06 1.96828514540465E-03  
 -2.50277905123746E-03 6.15473993507808E-02 3.10723292335269E-01 -1.44071148945750E-03 -3.80587697798793E-03

2.52961351867924E-03

\* ORBITAL 1 11

-1.35682974149715E-03 1.06537402034620E-02 -3.72775823699647E-03 -1.35434625904598E-03 -1.64344239081524E-03  
9.80195929222366E-05 -2.13120084328784E-04 -9.73478513277032E-01 6.16494822571268E-02 -8.46959485162270E-02  
8.86733515627233E-03 -2.29319028737222E-03 -2.80794364929344E-03 7.86858373185051E-03 -1.10828577304548E-01  
1.16399651426507E-04 -8.88798194671011E-05 3.25503693060000E-05 -4.33818979080089E-01 -3.61755838259819E-01  
-4.98173887657033E-02 -7.01942068446763E-04 -1.19630780460781E-03 1.79841254720065E-03 4.19732024875606E-01  
3.56967949119633E-01 6.32673579173564E-02 6.95763475884050E-04 -5.93439577043217E-04 -1.69369386002021E-03  
-7.04873270680916E-05 2.38733763043343E-04 -1.26412817216789E-03 -1.12167416831419E-02 -3.11981644684114E-05  
2.56201659702091E-04 1.44779975071893E-03 8.96643067316939E-03 -2.55236130249743E-02 4.73749856345098E-02  
1.19028910581970E-03 1.37298507726220E-03 3.43776375858709E-04 1.39179105199038E-03 -4.45258641035468E-03  
-8.31042498951006E-05 1.64306945637161E-06 -2.63760635789244E-06 -2.91552704069773E-03 -1.25583281845128E-02  
-4.99741866549463E-02 -2.88101685751687E-04 8.06664697378150E-04 3.02475059027731E-03 -4.22336559752942E-05  
-2.21239837562748E-04 3.96704655130530E-04 2.89966843295072E-05 1.08526092938894E-03 4.35905635010394E-05  
3.13387369179067E-03 1.36809905865421E-02 5.66769676394694E-02 2.84597697374019E-04 7.60849026006411E-04  
-2.90172704508385E-03

\* ORBITAL 1 12

9.40305651928917E-02 -7.66896321030482E-01 2.41670958894721E-01 5.65454524698219E-02 3.10279622743500E-02  
-1.37767765533654E-03 1.06776649318007E-02 -1.46529767539847E-02 8.06762994626948E-04 -1.21665208464274E-03  
-6.30545899125328E-01 1.71885785625292E-01 1.64066805603191E-01 1.24883604690644E-04 -1.75669548116225E-03  
-7.97393512407571E-03 -2.67506455427696E-03 7.30885009135161E-03 4.80054498728281E-01 1.62464259853406E-01  
-3.91405752309431E-01 1.09375849694502E-03 1.83462715410547E-02 -2.33831538925466E-03 4.93080727136845E-01  
1.73166578530595E-01 -3.88286346557458E-01 1.07957244950051E-03 -1.82579147990831E-02 -2.37979084463160E-03  
7.71053989371050E-03 -2.23164436496849E-02 7.29512068014623E-02 6.61191819589053E-01 3.17419533347703E-03  
-1.73097698994051E-02 -8.03082532361793E-02 3.87668450431488E-05 -5.49194230079729E-04 4.12529908784237E-04  
-8.28380369886158E-02 -8.59581437097371E-02 -2.05912791868816E-02 2.11376214420341E-05 -7.20697856651242E-05  
5.72616372422366E-03 -4.98116047037663E-04 1.52669218514224E-04 -5.76666272373506E-03 -2.94958235997650E-02  
-1.91008237766475E-01 2.31216428122250E-04 -1.06730550344345E-03 -4.20256140313371E-03 2.20615449435922E-03  
1.29312804583051E-02 -3.14428420689968E-02 -1.48844584863483E-03 1.13699088172029E-05 -2.56433294016252E-03  
-5.70544280158014E-03 -2.94191172779401E-02 -1.90131567321998E-01 2.41688533847480E-04 1.09040281153397E-03  
-4.29806106019541E-03

## (3) H6-C4-N1-H3 dihedral angle equaling 95°

## \* ORBITAL 1 7

-5.00784374586217E-03 1.10903731158265E-02 2.32285177273715E-02 -2.73713650615397E-02 7.15595361431665E-02  
 4.05959061043478E-02 -4.56917155127407E-03 -1.97731362907046E-01 -1.09066534948283E-01 2.26010226146259E-04  
 -4.46074302470343E-01 -2.47511246518377E-01 2.86079313580484E-02 2.69943190160732E-03 -5.65677030631685E-03  
 2.38019941354553E-02 -1.37247417547482E-03 9.70298166762293E-03 -9.99419719804205E-03 -2.82865607603687E-02  
 -2.09449108619092E-02 1.58056421874533E-03 -2.45826011065039E-03 -9.59622169816081E-03 -2.08293497103579E-01  
 -1.05744334030353E-01 -3.76522534732610E-02 -5.49970477114617E-04 1.33852651947872E-02 -2.66972723925918E-03  
 -5.31102950068902E-02 1.13295690351616E-01 4.20883974367954E-02 5.64854720201697E-02 -1.30589678420532E-02  
 -3.68988358286801E-03 4.93620630676687E-03 1.14859452024517E-02 1.81156812033768E-02 6.60635423468956E-04  
 3.10016015239524E-01 1.04557834068021E-01 2.91027626514356E-02 -6.63690384476699E-04 -5.95395637979547E-03  
 2.79476258214209E-02 -2.61938246737643E-03 6.54343673548361E-05 -1.99800436172849E-02 -2.19402623397875E-02  
 9.23916977547828E-03 -2.72355680210163E-04 4.86078376988525E-04 3.69059003535431E-03 -3.38685697689369E-02  
 -3.59167482513350E-02 -9.17318557305799E-03 1.07567649668392E-03 1.72182343811345E-04 3.32042628050420E-03  
 -4.63400577899064E-02 -5.09457077394813E-02 3.26310073847553E-03 -7.54003812435385E-04 -1.00492290278531E-03  
 2.90438388708281E-03

## \* ORBITAL 1 8

1.32374777746229E-01 -2.90569450243061E-01 -2.95560049983417E-01 6.72277664616000E-02 -1.22873141885236E-02  
 -1.01376421925685E-02 3.54806151094794E-03 -3.39003284631272E-01 -1.91548509917782E-01 -3.58930442616052E-04  
 1.33932285450698E-01 8.81233471553249E-02 -2.47120318711086E-02 4.61401119825147E-03 -9.17730818003917E-03  
 -9.45794058133101E-03 1.93027370349606E-03 4.65668318634728E-03 1.09288287976253E-01 6.52566128298669E-02  
 2.26445085171239E-02 7.02340649787344E-04 2.30962265086927E-03 -5.78791890491145E-04 -2.31409960948731E-01  
 -6.27105139167977E-02 -2.38038616296225E-03 -3.0748498587850E-03 1.77249507250472E-02 1.13984769841430E-02  
 2.62458479546936E-02 -5.31827125100166E-02 1.83680534102151E-02 -6.83707706009261E-02 1.08797909716863E-02  
 1.77523185519112E-04 -1.93154959191571E-03 1.24891615720520E-02 2.82413918315585E-02 7.13778541495243E-04  
 -1.89349479875527E-01 -4.56127282871771E-02 -2.51255822530389E-02 -7.83213298822711E-04 -1.00870762507947E-02  
 -2.24183249287206E-02 2.75636926854594E-03 3.13740351984611E-04 4.39891078136561E-02 4.16876630874244E-02  
 6.49472261748796E-03 7.35664859894467E-04 -8.58169315344985E-04 -1.23214209183894E-03 2.64341162796002E-02  
 2.17757701979009E-02 8.54789236186292E-03 -8.35563884266676E-04 1.65662096908642E-04 -1.89117567191170E-03  
 5.82748776285973E-02 -2.25846267154121E-03 -4.50835941217419E-03 1.42866287739430E-04 9.93118829254499E-05  
 -2.30157034194437E-03

## \* ORBITAL 1 9

-8.28311059208650E-03 2.03707360795657E-02 2.74116363118454E-02 -4.59200222434475E-02 6.00788021843051E-01  
 4.84702784823157E-01 8.19780688686725E-02 2.93504616376221E-04 5.88948897790813E-04 -1.13168298454229E-03  
 9.57673206006749E-02 7.88448441471897E-02 2.36499335497220E-02 1.22380788805864E-04 -2.07713132775172E-05  
 3.30056428775519E-04 -3.45340908259290E-03 -2.25651562291422E-03 -1.31509383293254E-02 -5.64967438563973E-04  
 -1.57235632604907E-03 1.90592516002240E-02 -1.85513643825538E-03 3.55104569436543E-03 -1.27451544045836E-02  
 7.29423775703771E-04 -3.66646242846833E-04 1.80217447334291E-02 1.51232228438061E-03 3.23445530709865E-03  
 9.71969349395307E-04 -5.37036319871255E-03 2.01982445991656E-02 6.89800553437097E-02 -8.52355656014644E-02  
 -7.17998383976906E-02 -1.94547609294151E-02 -6.48280843324749E-06 2.95039077232808E-04 -1.37305426696713E-03  
 -2.11988339973417E-02 -6.56615421709736E-03 5.34088518876561E-03 1.44729787684434E-05 5.83930806826643E-05  
 1.84885175046300E-03 2.92168918957547E-02 -1.12849338993365E-02 5.46676616443411E-02 6.97490757611174E-02  
 -7.36566504346910E-04 -4.31907375597427E-04 -2.07593890624286E-03 -2.36780619371068E-05 -9.95043231388806E-02  
 -1.39315833000433E-01 -2.35927780112455E-02 2.27154088834154E-03 3.58245295526096E-05 -9.67611202787325E-04  
 5.51098064905962E-02 6.95792359438326E-02 -4.75288330799937E-03 -4.46805812343238E-04 2.04294710076756E-03  
 -2.40874340411387E-05

## \* ORBITAL 1 10

6.06064441650840E-02 -3.44665910773477E-01 -8.56659340305576E-02 -7.77593206275627E-02 -1.11838193211715E-01  
 6.14636567858492E-03 2.87407045181330E-03 1.08670493027541E-01 2.18002361146672E-02 2.92746831678832E-02  
 8.61423414074044E-01 -9.14411954229808E-03 -1.19273939989996E-02 -3.99265862343568E-03 2.96093371770167E-02  
 -6.85926035751233E-02 8.46980197491931E-03 -3.82170591837785E-02 -1.45741791220939E-02 5.03593729974896E-04  
 3.66191984985631E-02 -1.20703681486873E-03 -2.50029373101128E-03 7.18802004778582E-03 -1.32227173556581E-01  
 -1.39667110072585E-01 1.90519355999149E-02 8.48358612113013E-04 5.27498248176367E-03 -7.64281873704385E-03  
 -9.66137016100513E-02 3.19019231450478E-01 2.89817055123708E-01 1.93300090842046E-02 -2.72081601550968E-02  
 -1.38925783712436E-02 8.60337449717335E-03 6.15852023955410E-04 5.63396392141910E-03 -1.65966299192348E-02  
 6.21015877592268E-01 2.73716468022893E-01 2.30905307813193E-02 -6.92598159389742E-04 2.35295849303931E-03  
 6.15862091769656E-02 -4.86587520549720E-03 -2.46373794888417E-03 -2.15034378476422E-02 -4.93896757237670E-02  
 2.99984102755110E-02 -9.59982480781173E-05 -1.33384333200011E-03 8.24746938503441E-03 -2.57476793019461E-02  
 -5.43007808682600E-02 -1.00293152961164E-02 -9.51529686832714E-04 -5.29185420174911E-04 8.43083192269371E-03  
 -1.86556923190596E-02 -4.31645354020547E-02 -6.44459456512607E-03 1.60993564807797E-04 9.88292031533662E-04

9.55290037969496E-03

\* ORBITAL 1 11

5.87510210844459E-02 -1.35561876781195E-01 -5.24027116970994E-01 -4.74962800917505E-01 2.07058302999983E-02  
2.67008671509107E-02 1.19141425245822E-02 -2.22851695046128E-02 -2.44227380335346E-02 -9.25371906253665E-03  
-9.48150467195493E-02 -9.53295188220978E-02 -2.80664513169563E-01 2.33332455077788E-05 5.98053209903903E-05  
-9.69520360146562E-03 2.66308503900389E-03 3.95764468055101E-03 3.27433616571367E-02 2.57349277967890E-01  
7.09039507498085E-01 -4.20654117931960E-04 -9.16182719470629E-03 -9.16888762453199E-04 4.05000660450698E-02  
3.13002041285870E-01 8.98320306096225E-01 -7.30691285147469E-04 1.11148811560104E-02 -3.00885119322400E-04  
2.09468390308795E-02 -4.82635894845428E-02 -1.92169364392889E-01 -1.15724624587985E+00 1.35778684929953E-02  
2.69814248739966E-02 9.17678508766727E-02 -5.35648429915562E-03 -4.07466933932049E-03 -1.07642516320293E-02  
7.44732285777805E-02 1.09402604268716E-01 7.79382987364196E-02 4.26900413877480E-05 -4.51824536636152E-04  
-4.67603685791115E-03 1.44113895315940E-03 -2.20366410909291E-03 -1.65500031001517E-03 7.21438112261004E-02  
3.73143497343159E-01 -1.70897506070159E-03 4.29027208650212E-03 2.39787353343256E-03 -7.11018948138853E-03  
1.99809345302747E-02 1.52671591768347E-01 3.18443907521170E-03 -2.13111131517049E-05 2.05999412369092E-03  
-1.74200419857517E-03 6.87527464562170E-02 3.31369309674491E-01 -1.47603931454319E-03 -3.91402789252291E-03  
2.43314463085966E-03

\* ORBITAL 1 12

8.54990212396340E-02 -6.68141913648951E-01 1.71416037059584E-01 6.45570056566459E-03 9.18124330394835E-02  
-3.03284374876031E-02 -4.31489886459629E-03 -7.47557648060520E-01 1.17688711359819E-01 -5.69149014402708E-02  
-1.14989032849545E-01 2.99595240140053E-02 1.30865315802555E-01 1.45403086847871E-02 -4.38752760029651E-02  
2.86644058791323E-02 -4.55345613163384E-03 1.98707000805766E-02 1.46402082238168E-02 -9.38873815956462E-02  
-2.90096166595211E-01 2.71191401724717E-03 1.46123386213400E-03 -6.86434032920844E-03 6.41220926916411E-01  
3.37522806052360E-01 -2.69350598592681E-01 -1.27682063215974E-03 -1.62047515687259E-02 -7.03901643775188E-03  
-2.75060082913334E-02 7.64322595351891E-02 1.13522294689858E-01 5.17363579502248E-01 -1.25296019444095E-02  
-1.27715588523464E-02 -5.68964136735483E-02 1.22090645366005E-02 -1.62134179156874E-02 3.30649018795991E-02  
1.19637447323453E-01 8.65119029127701E-04 -6.30181079010542E-03 4.61794294987932E-04 7.78443636672620E-03  
2.14598363536327E-02 -3.93922197235389E-03 -4.20438157436570E-04 -1.87021368324120E-02 -5.45188086062885E-02  
-1.93137312184933E-01 3.58320437720359E-06 -1.49606129803884E-03 1.57266416456364E-03 -5.63730085690011E-03  
-2.79274912174400E-03 -2.99423810008165E-02 -1.61159202115850E-03 8.98527061969807E-04 5.26748368205994E-04  
-8.08842721158343E-03 -3.10412305080976E-02 -1.07357507833215E-01 -3.30555697154505E-04 1.75771092077663E-03  
-1.71044900354839E-03

## (4) H6-C4-N1-H3 dihedral angle equaling 100°

## \* ORBITAL 1 7

-5.41837967095599E-03 1.23874633856432E-02 2.44358417147348E-02 -3.13173936001592E-02 9.32293837345931E-02  
 5.30042432674838E-02 -4.99611669228020E-03 -2.00665848274631E-01 -1.09753685746149E-01 2.97891465602423E-03  
 -4.40729243943884E-01 -2.43758767095964E-01 2.99065092498862E-02 4.76645623965931E-03 -5.40173897776768E-03  
 2.42887807485990E-02 3.52749382559907E-04 8.98525839820433E-03 -9.65637085420845E-03 -2.43333486836811E-02  
 -1.92980606160575E-02 2.00646803543074E-03 -2.63521413760286E-03 -9.40721592309621E-03 -2.10223818231628E-01  
 -1.07850698617992E-01 -3.96616336529846E-02 -1.41843495860132E-03 1.33183408051394E-02 -2.51458516408542E-03  
 -5.27701150144417E-02 1.12459377932320E-01 4.26537431406987E-02 5.98858468556950E-02 -1.30513865228824E-02  
 -6.45166441675753E-03 4.48264460336779E-03 1.15690394312646E-02 1.81672507513140E-02 4.14022538013869E-05  
 3.08324835562851E-01 1.04337986111901E-01 2.98617166830616E-02 -5.63771842972668E-04 -6.08154114941160E-03  
 2.79127115361906E-02 -2.04849721227368E-03 -9.63100729154326E-05 -1.92527993595051E-02 -2.15983822513688E-02  
 9.97363830632312E-03 -2.24931439692649E-04 5.07385459978500E-04 3.63675529535919E-03 -3.45818830911859E-02  
 -3.57621132743007E-02 -9.89205815000979E-03 1.04684118938830E-03 1.70253121745675E-04 3.29653539663844E-03  
 -4.60776189570142E-02 -5.01340948662547E-02 2.53691855017063E-03 -7.17517433224485E-04 -1.03410184080659E-03  
 2.90851366212680E-03

## \* ORBITAL 1 8

1.32313398059406E-01 -2.90639140213033E-01 -2.95411895919934E-01 6.69345308557100E-02 -9.75880981930565E-03  
 -1.04830275982389E-02 4.00763685696750E-03 -3.38569823393539E-01 -1.89724766865385E-01 4.38550402126333E-03  
 1.36684977009461E-01 8.93300472950829E-02 -2.48634273241910E-02 8.11561708902250E-03 -8.61142625099078E-03  
 -9.73012995615146E-03 1.57860551311283E-03 4.42694647785240E-03 1.09306372615101E-01 6.99342613875319E-02  
 2.56132165511961E-02 1.35620848019601E-03 2.00700575147210E-03 -4.34187402120344E-04 -2.30075690851700E-01  
 -6.63462455101188E-02 -5.21520205526456E-03 -4.69029006495900E-03 1.72997004985260E-02 1.13021237257395E-02  
 2.65730833343409E-02 -5.38868604936177E-02 1.83989195999071E-02 -6.75898562222614E-02 1.59564148861346E-02  
 3.21491174827799E-03 -2.23471292627973E-03 1.25099153800609E-02 2.79220698814847E-02 -4.80033992348364E-04  
 -1.90584171893369E-01 -4.59923806690014E-02 -2.52957066797784E-02 -6.07002143768263E-04 -1.01458551739987E-02  
 -2.25479794780454E-02 2.68212868207835E-03 5.77115280312858E-04 4.26850536222840E-02 3.99308915921529E-02  
 7.11579528560598E-03 7.47978191182044E-04 -7.78652245519346E-04 -1.34044614067629E-03 2.95028988985764E-02  
 2.36718226396905E-02 9.16689845352411E-03 -9.49217240028556E-04 1.60711256073280E-04 -1.86083913155161E-03  
 4.26886019293309E-02 -2.59743937728358E-03 -6.53251226969853E-03 1.41938188587583E-04 1.85331363788399E-05  
 -2.29897619346879E-03

## \* ORBITAL 1 9

-1.75453011313334E-02 4.29169053645557E-02 6.40908534632333E-02 -6.43158811263961E-02 5.92784001383113E-01  
 4.77358532576447E-01 7.97543666911942E-02 -8.69168975328927E-04 -5.20423499783071E-05 -2.83928986740683E-03  
 1.25590372965715E-01 1.02799044908950E-01 3.36926376732742E-02 1.23986095250619E-04 -8.92924778312705E-06  
 1.09387789983629E-03 -3.86830103617933E-03 -3.40935672578177E-03 -2.59748673679189E-02 -7.12247393648320E-03  
 -2.92816233104515E-03 1.80806781532183E-02 -3.30670064672542E-03 5.04062850632634E-03 -2.48765851303795E-02  
 -4.27428683015848E-03 1.02786981555556E-04 1.71972072498508E-02 2.57523010910695E-03 4.54207862653880E-03  
 2.70648682097605E-03 -9.98999158202026E-03 2.39368144932104E-02 9.16434938100130E-02 -8.52738733845608E-02  
 -7.23469180891863E-02 -2.00102885223242E-02 -5.60493283718960E-05 6.45994750975607E-04 -2.92497889766350E-04  
 -3.29504197587083E-02 -8.84064287936582E-03 9.56234677181576E-03 3.46244503447288E-06 4.16206736142327E-05  
 1.22084102046299E-03 2.89833285574511E-02 -1.10682385653006E-02 5.57612932254716E-02 7.10329552451574E-02  
 -4.00795958055943E-03 -4.15090828156062E-04 -2.13844908720336E-03 -1.81422608987946E-04 -9.77670832122871E-02  
 -1.35409091998769E-01 -2.50133023616572E-02 2.23776251200288E-03 2.61631903511253E-05 -1.16547621676451E-03  
 5.61920413882169E-02 7.09966793746215E-02 -5.72843567876453E-03 -4.20260648510502E-04 2.10958648302953E-03  
 -1.71303992615656E-04

## \* ORBITAL 1 10

5.97745657127757E-02 -3.39171546624803E-01 -8.62573185742294E-02 -7.99830311791270E-02 -1.30418592467117E-01  
 8.86695229775451E-03 6.80873855993622E-03 1.18392045906862E-01 2.01305005413386E-02 2.86818620235420E-02  
 8.59469991596887E-01 -8.09596347405507E-03 -1.12419905157579E-02 -4.60201540026190E-03 2.91705585885622E-02  
 -6.91165824447824E-02 9.58370804449488E-03 -3.72509277447926E-02 -1.39640490746451E-02 1.28711605052911E-03  
 3.85057329591209E-02 -1.52841272689035E-03 -2.15168746870267E-03 6.81817520747209E-03 -1.39470961565706E-01  
 -1.43887982885288E-01 2.14822455475259E-02 9.55572017262881E-04 4.75650000464919E-03 -7.78764439422081E-03  
 -9.63171406785078E-02 3.17373329383293E-01 2.90738914636463E-01 1.74889888614093E-02 -2.67902768621712E-02  
 -1.81060457212280E-02 7.03440320662950E-03 4.61765908513055E-04 5.29828725874920E-03 -1.82176316605811E-02  
 6.19027372675907E-01 2.74728777947018E-01 2.30759824890666E-02 -6.92545600712223E-04 2.21241861724870E-03  
 6.11653521158901E-02 -5.70111297537836E-03 -2.42624372777380E-03 -2.19425201060949E-02 -4.90622195683964E-02  
 3.29899018471451E-02 9.04620274843479E-05 -1.22910916472539E-03 8.19737485780578E-03 -2.48191028286066E-02  
 -5.11678111873108E-02 -9.85236006903184E-03 -9.47924967907552E-04 -5.12084185040438E-04 8.55385975766305E-03  
 -1.91730879064898E-02 -4.51411205441201E-02 -7.97098037170094E-03 3.28020960552039E-04 8.44170070296986E-04

9.42438001821530E-03

\* ORBITAL 1 11

5.81756247285807E-02 -1.34294128113816E-01 -5.19870687434643E-01 -4.75111549117453E-01 3.45020712388227E-02  
4.75002537107171E-02 2.55502297022592E-02 -2.26606731001638E-02 -2.47746005554075E-02 -9.05177425184452E-03  
-9.14881805313918E-02 -8.94165492605506E-02 -2.71631108917256E-01 5.43203423732265E-05 6.13363277417938E-05  
-8.83048984329073E-03 3.52684040776847E-03 3.72416303056261E-03 3.08147183436304E-02 2.51112400481406E-01  
7.03339794668873E-01 -6.78487184213393E-04 -9.09125278415072E-03 -7.16045498195935E-04 3.85918534755126E-02  
3.07806704430747E-01 8.95939516776979E-01 -1.13398709860112E-03 1.10187065914036E-02 -1.04013462138113E-04  
2.07284754463856E-02 -4.80055443948982E-02 -1.88246065581085E-01 -1.14846221352421E+00 1.66009980167364E-02  
2.71326619326091E-02 8.85347705388561E-02 -5.49197182918853E-03 -4.31118541528403E-03 -1.23164795847036E-02  
7.54325733516394E-02 1.11841409693019E-01 8.07801339766800E-02 2.39327977010736E-05 -4.64475326827357E-04  
-4.55443767168151E-03 2.09546495909169E-03 -2.18887037452520E-03 -1.45884813927325E-03 7.32346790752016E-02  
3.76372135270258E-01 -1.77466739261295E-03 4.34540254542586E-03 2.34801982769682E-03 -7.43385756994203E-03  
2.00244006202949E-02 1.51368783444084E-01 3.04972934744327E-03 -3.26194740577541E-05 2.16246259177106E-03  
-1.62785224668394E-03 6.92309728427912E-02 3.30263689830170E-01 -1.52281536259254E-03 -3.96502329786047E-03  
2.37331670700450E-03

\* ORBITAL 1 12

8.50000108820443E-02 -6.62380149208822E-01 1.65905414006289E-01 2.24174051738800E-02 1.59939584774952E-01  
-5.34524240208953E-02 -9.10303332648331E-03 -7.42642939575883E-01 1.06659305037559E-01 -7.01949108692718E-02  
-8.89600017959879E-02 1.96333682221268E-02 1.18243884528069E-01 2.34422284199820E-02 -4.06197380531087E-02  
2.58287598749012E-02 -5.60360104679309E-03 2.05760364917107E-02 1.03476063401318E-02 -1.06068317401488E-01  
-2.89662709280679E-01 4.15658935516252E-03 1.14381935678837E-04 -5.46684667477910E-03 6.37642727888314E-01  
3.50687008596075E-01 -2.55502740089943E-01 -3.09879110908647E-03 -1.53567555971850E-02 -7.77682495879660E-03  
-2.85160157379959E-02 8.15767701996502E-02 1.07200301396759E-01 4.87317989302029E-01 -1.66427320522980E-02  
-1.13987352836590E-02 -5.53513070146054E-02 1.20520267205716E-02 -1.16559043556656E-02 3.96687710683585E-02  
1.27536096140300E-01 9.05928166897061E-04 -1.16604383237624E-02 -1.12710806117966E-04 8.13466310384078E-03  
2.17079672871342E-02 -5.71683614870123E-03 -2.03044294903131E-05 -1.97661503009224E-02 -5.75966478573266E-02  
-1.98349743994366E-01 -7.55945803125030E-05 -1.61557975386446E-03 1.92393568745272E-03 -5.03218078170740E-03  
2.05816052831646E-04 -2.59663851037071E-02 -1.46127693570458E-03 8.06199603841462E-04 3.96721243353732E-04  
-7.76715358001044E-03 -3.27736476897192E-02 -9.77049850194561E-02 -2.87743428927659E-04 1.91023651265795E-03  
-1.31116806155701E-03

## Natural orbitals of SA-CASSCF calculations near LAC (only active orbitals are shown)

### (1) eclipsed conformation with N-H3 bond fission

#### \* ORBITAL 1 7

1.16170440631055E-01 -2.59447387804259E-01 -2.76789783903110E-01 6.68864370059539E-02 1.25478276035925E-01  
 7.27904714494128E-02 -1.05240935184362E-02 -1.59228769664974E-06 -9.09194061927077E-07 -6.48439308630011E-07  
 3.62631629016312E-01 1.88060184391870E-01 -3.45684384897466E-02 -8.81430657770172E-07 -1.37933397016880E-06  
 -2.43584174936571E-02 1.03638563378339E-02 6.98622773596216E-03 9.69681034606024E-02 9.59368813543205E-02  
 3.02960345108816E-02 -2.50842010462723E-03 2.90496477467636E-07 3.84211251584941E-03 -1.67700024617457E-03  
 6.54911732331249E-04 3.90171055349687E-03 -1.31432976619446E-04 -1.90768009566572E-08 5.37104272113349E-04  
 5.91344644869112E-02 -1.24945639133826E-01 -2.86556935350944E-02 -7.58103824212888E-02 -2.33518627504602E-02  
 -2.34037679562097E-02 3.89827152176272E-03 7.44209163695612E-06 5.21158325920671E-06 2.62802126660848E-06  
 -3.47168677027030E-01 -1.04006081970940E-01 -3.43780547573260E-02 -1.04481550592501E-06 -2.47085576695639E-07  
 -3.49259172137496E-02 3.57320313287464E-03 1.40866418620861E-03 3.17614186115827E-02 3.22522565829924E-02  
 -1.71208645810066E-03 -6.62113214513559E-04 7.63388927006895E-04 -3.75956493815844E-03 5.23595564933564E-02  
 5.43256402348898E-02 9.72625445033971E-03 1.13001029049223E-03 -2.79705682534865E-07 -3.46205747163745E-03  
 3.17560578111115E-02 3.22490396182651E-02 -1.72120011070215E-03 -6.62395004900574E-04 -7.62557102813665E-04  
 -3.75974029445763E-03

#### \* ORBITAL 1 8

8.84285261033073E-06 -2.11020430708170E-05 -3.68559474081757E-05 -1.33857655285865E-05 8.93775427432932E-06  
 1.68163444882256E-06 -9.70300596819221E-06 -6.17215437751203E-01 -4.70075786872666E-01 -1.35087958378026E-01  
 -1.76819766755808E-05 -1.16597349303827E-05 -3.39139186725329E-06 -1.13709278859051E-02 8.18423644380081E-03  
 2.81866350279565E-07 1.11261570435895E-07 7.99279722896135E-07 1.26610002949679E-05 1.71734561800514E-05  
 5.61475815878498E-06 -8.35837591699229E-07 -2.04579273705809E-02 -1.19351770722019E-06 1.52466371714278E-06  
 -6.06774308529110E-07 -1.09874523009287E-06 4.25871276150404E-08 -1.93408847638764E-03 -1.10171839674926E-07  
 -3.05109711571437E-06 6.30185464809039E-06 1.01348782651302E-05 1.39744986544581E-05 -1.81220094394243E-06  
 2.82262656134879E-06 1.46411223904917E-05 4.96696149035135E-02 3.75300522822500E-02 5.08258837503823E-02  
 1.26175908694618E-05 4.05999781082074E-06 -1.97513339227199E-07 7.93251696006540E-03 -3.33407103063064E-02  
 8.47463938161098E-08 2.11060768038861E-07 7.3933260351919E-06 -7.85286795798803E-02 -1.31930077284798E-01  
 1.06137510674705E-02 1.31429857082989E-03 -1.07444861493263E-03 2.89757470091280E-04 2.73921511733958E-05  
 4.67808565666362E-05 1.12502592863139E-05 1.26089750445686E-06 1.43013513937196E-03 8.89356967146453E-08  
 7.85001757682541E-02 1.31872334741270E-01 -1.06355317351035E-02 -1.31550102501104E-03 -1.07280300596308E-03  
 -2.89758951815098E-04

#### \* ORBITAL 1 9

2.60515955517578E-06 -4.78299623095938E-05 5.24508222285093E-05 2.62421214514595E-05 6.85790127093124E-06  
 9.19267824341410E-06 1.53158229183455E-05 -9.10904181936611E-01 7.15924495234781E-01 3.97881254698381E-01  
 -5.56005834437085E-06 3.28531738211664E-06 7.32431558547873E-06 5.33012221830005E-02 1.30378947151588E-02  
 8.72247451434467E-06 2.07068359725937E-06 1.48298150429731E-05 -5.61635791162659E-06 -1.87074666629471E-05  
 -9.25119256340808E-06 7.79119394314288E-07 1.29155907415502E-02 7.63167517239325E-07 2.29069970680772E-07  
 1.48464230806030E-05 2.01167271448928E-06 2.27083770371468E-07 1.19317791840332E-02 3.87275467957979E-07  
 1.44611903585271E-06 -3.01285432354275E-06 -2.18849701552107E-05 -4.44169330161390E-05 6.99161447235173E-07  
 -9.46187142331691E-06 -2.58796836793139E-05 5.92934599507093E-02 1.23328182943554E-01 -1.63559565094929E-01  
 4.83990402983075E-06 9.94076602433391E-06 -4.34227985024615E-07 -1.05660056976584E-02 8.73871945199456E-02  
 1.91143974068485E-06 1.07935880291313E-06 -1.07084294286068E-05 8.79639281663947E-02 2.65368560549184E-01  
 -6.47057558833256E-02 -1.33308891290920E-03 -5.59488781464484E-04 -9.39774855503528E-03 -2.73366396683708E-05  
 -9.01753490817197E-05 1.51059858674899E-06 -8.50819791361527E-07 -1.92344065408245E-03 3.0213088824638E-06  
 -8.79320266682284E-02 -2.65246702888222E-01 6.47348654689491E-02 1.33382527465425E-03 -5.60498065145867E-04  
 9.39548209795564E-03

#### \* ORBITAL 1 10

6.09675481354792E-02 -1.36531522096908E-01 -2.35320228964163E-01 -3.21365215355408E-02 4.00717056740321E-01  
 2.91357186419829E-01 2.93800986410701E-02 2.26663406179987E-05 1.98856662527775E-05 8.28482885055157E-06  
 -2.28826453953918E-01 -1.59428191653745E-01 -3.25063567165123E-02 -1.47427202995648E-06 1.25008584294587E-07  
 3.94432395066000E-03 -1.42384669791068E-03 1.04355332548840E-02 9.95238004926242E-02 8.98692542314420E-02  
 2.12413751829158E-02 2.83471166932107E-03 1.32656508179001E-06 -1.13702617533466E-02 -1.82630987416640E-01  
 -2.33617502252050E-01 -2.62544906367062E-02 -9.97627758400139E-04 -3.25494882496849E-10 6.63901559376864E-04  
 -2.20061151226886E-02 5.08559333349774E-02 3.16369355960504E-02 -3.15297477572922E-02 -4.34340255335378E-02  
 -3.75863418335283E-02 3.79943205910505E-03 -3.18275143206736E-06 -5.16720399700269E-06 -8.12384900867904E-06  
 1.17190333515804E-01 4.76533331999414E-02 1.36237320397796E-04 -4.98455426690818E-06 1.39102772112435E-06  
 6.63411162981817E-03 1.87511762326498E-02 5.79173490040816E-03 -3.95444169909365E-02 -5.99594802066980E-02

-1.12435494893931E-02 -3.59766604404073E-04 -1.52165620528175E-03 1.20800353687244E-03 4.84062232932927E-02  
6.97781718335714E-02 2.94274965750914E-02 1.73281473539461E-03 -8.34596783982330E-07 1.62550087508064E-03  
-3.95796159784555E-02 -6.00091167258788E-02 -1.12453887966873E-02 -3.58276347533256E-04 1.52237044474924E-03  
1.20797821232366E-03

\* ORBITAL 1 11

8.78532656438256E-02 -5.63755930602660E-01 -3.94376981871908E-02 -4.17625764312938E-02 -9.48706625753442E-03  
-9.46353573028542E-03 -1.77657212167146E-03 1.21646426795001E-05 3.43888235001895E-06 2.52668411091287E-06  
8.02283702598236E-01 2.36367347612630E-02 1.64190684232230E-02 -3.82454805077477E-06 5.16077128732984E-07  
-6.81014010559684E-02 8.52958191911955E-04 3.97855238085112E-02 1.03206134179608E-03 -4.24170592259430E-02  
-1.44569957946941E-02 1.89389195313475E-04 2.45279868283933E-07 8.69033246627801E-03 -1.26673951369813E-02  
-1.47069527734358E-02 -1.06573006976273E-02 2.83386106319467E-03 3.20400348571577E-07 -3.55696303646501E-03  
-1.00674108988046E-01 3.46041876685275E-01 3.00757239550029E-01 8.20700051656028E-02 2.12621457849667E-02  
1.37502857168572E-02 1.38995819458332E-03 -1.23969996500924E-05 -3.09104189840214E-06 -3.00040129932792E-06  
6.46543135001377E-01 2.57144127424480E-01 1.36328939938338E-02 -6.25738362682337E-07 -2.73987044217049E-06  
7.22438515411596E-02 8.14587570145127E-03 -1.17721455972212E-04 -2.66685992166600E-02 -5.50623299050319E-02  
-1.18151306252068E-02 -3.90171933208122E-04 6.15922791335422E-04 8.61903602710543E-03 -1.85656018764622E-02  
-4.84075532288807E-02 -1.01756730642913E-02 1.94571621380350E-03 -6.71963056178472E-07 7.57578241735776E-03  
-2.66650497568883E-02 -5.50671381766898E-02 -1.18100008806780E-02 -3.91010766550659E-04 -6.16751558972788E-04  
8.61855080235904E-03

\* ORBITAL 1 12

-5.44521029747400E-02 1.28162279798112E-01 2.46159603759200E-01 9.29484259997020E-02 -2.82415918236382E-01  
-2.30032209327535E-01 -6.11188256942676E-02 -2.00433403260534E-05 -1.98405211710853E-05 -1.06912349457757E-05  
1.58024843099727E-01 1.27656140976515E-01 3.57435826325910E-02 3.70065635514188E-07 1.02403324069042E-07  
1.67601746137989E-03 9.41552489490222E-03 -8.58023369850112E-03 -5.56873159790146E-02 -5.73538643106502E-02  
-1.55424388722423E-04 -2.34522332682896E-03 -1.04107501646181E-06 7.55011214998205E-03 -3.86415812592502E-01  
-6.53332260971687E-01 -1.02955503947958E-01 5.73724597499005E-03 1.52060730783450E-07 -3.12288161830739E-03  
1.14575295812010E-02 -2.61975798775414E-02 -2.09373542478404E-02 -1.50287231288537E-02 1.51979589338841E-02  
2.09065599397633E-02 1.69248917915808E-02 4.20005255013323E-06 7.50891248801219E-06 8.25157874344434E-06  
-7.39171004908666E-02 -3.95526999676201E-02 -6.73510095190109E-03 3.13423522014564E-06 -1.25269381157642E-06  
-3.44724491001880E-03 -1.26831523610344E-02 -4.14258747542782E-03 2.47002127235304E-02 4.14710784399311E-02  
3.16268382332808E-03 -1.24958918045905E-04 8.52322112358006E-04 -7.01891795862852E-04 -2.85031104407225E-02  
-4.94529195961319E-02 1.51741733250776E-02 -2.64399431956785E-04 4.76008246042934E-07 -1.71971208919027E-03  
2.47230234374067E-02 4.15057502340819E-02 3.14949157304292E-03 -1.25884656937350E-04 -8.52634489086260E-04  
-7.02022076656372E-04



## (2) eclipsed conformation with N-H3 bond fission

## \* ORBITAL 1 7

1.15934228486704E-01 -2.58833188724128E-01 -2.75703094914527E-01 6.93746356407182E-02 -1.31588718620445E-01  
 -7.50178224464223E-02 1.36975622322449E-02 -1.45125261855381E-06 -8.26191307954623E-07 -7.85046404616450E-07  
 3.60329553982799E-01 1.85737780224908E-01 -3.73784228704462E-02 8.89634755755565E-07 -1.38086244468017E-06  
 -2.44976032590618E-02 -9.21286901733573E-03 6.91817359172500E-03 -1.41627566238189E-03 9.06120060812003E-04  
 3.91015476957741E-03 1.34902392429893E-04 -2.29101029713936E-08 6.09553306124195E-04 9.84673677653798E-02  
 9.59299329935070E-02 3.33947375506359E-02 2.73348683755620E-03 3.09777839232285E-07 3.58419464468482E-03  
 5.95901897405259E-02 -1.25944081078463E-01 -3.09283036253320E-02 -7.92194904508068E-02 3.38965135796931E-03  
 1.26048626665000E-02 -1.22640989988871E-02 7.40985205161208E-06 4.94809941725937E-06 3.38708244740934E-06  
 -3.46836884454927E-01 -1.04616575661765E-01 -3.55155410655825E-02 1.13784888095683E-06 -2.67839557172592E-07  
 -3.46918679803919E-02 -4.25451755610474E-03 -1.14002224669169E-03 4.42360216773650E-02 4.37856933952076E-02  
 1.13219014840120E-02 -7.00263456854757E-04 1.03136961963402E-03 -3.53799529836497E-03 2.52334336813080E-02  
 2.87978299779665E-02 -1.75412222384995E-02 2.77149889732759E-04 2.98979729296640E-08 -3.94398146109820E-03  
 4.42440393953627E-02 4.37950935250322E-02 1.13240781639515E-02 -7.00893719199076E-04 -1.03085990057439E-03  
 -3.53792058854268E-03

## \* ORBITAL 1 8

8.79486768998422E-06 -2.07274284198150E-05 -3.82469148021680E-05 -1.74619072301523E-05 -9.13635969874940E-06  
 -1.07889603372531E-06 1.36147910690309E-05 -6.16920047144031E-01 -4.69408161934707E-01 -1.25964427537270E-01  
 -1.77170720929374E-05 -1.19247214531799E-05 -4.75373646531729E-06 1.37865534899984E-02 8.25493989087546E-03  
 2.62668261446749E-07 -1.60376926283540E-07 7.20936626941629E-07 1.37642657200766E-06 -1.01432459075518E-06  
 -1.04911130410929E-06 -3.34373030618582E-08 -1.55520615020561E-03 -7.26033753519215E-08 1.26869384443440E-05  
 2.11791036129534E-05 9.17135820704627E-06 8.32628909545605E-07 -2.08578146926909E-02 -1.25753067962650E-06  
 -3.02986752245290E-06 6.13388702279885E-06 1.07523615139241E-05 1.57239012553203E-05 2.86743774004999E-06  
 -3.57591993924118E-06 -2.18402380695973E-05 4.95434242376814E-02 3.03171396510928E-02 1.93691738249768E-02  
 1.26869090684421E-05 4.52109217986410E-06 -5.63483699115603E-07 8.26453327601048E-03 -3.33459402009362E-02  
 1.19899492226094E-07 -2.78906941571104E-07 7.27800509599438E-06 -7.78881890857729E-02 -1.41757909241539E-01  
 -2.59260794954514E-02 1.60893896534561E-03 -1.18301491346267E-03 7.97468177804468E-05 2.44060519740892E-05  
 3.58376793288230E-05 -2.41912270386185E-05 8.91044388826556E-07 1.54955283604899E-03 -2.19849566522488E-07  
 7.78625234137857E-02 1.41710328580492E-01 2.59369658077267E-02 -1.60990075157828E-03 -1.18176304914094E-03  
 -7.94436822211123E-05

## \* ORBITAL 1 9

-2.55671829685215E-06 4.76886404261085E-05 -5.36611518581922E-05 -3.44343828870934E-05 5.02467172430823E-06  
 1.24372255105683E-05 2.42268599803823E-05 9.10870771409342E-01 -7.12708277574719E-01 -3.65805957304421E-01  
 1.92416381876168E-06 -2.47166816123786E-06 -7.27812350773570E-06 5.85311474802324E-02 -9.34392582152842E-03  
 -7.64102614987640E-06 2.16937389266407E-06 -1.37543966335558E-05 -8.51050479506440E-08 -1.52789476218149E-05  
 -2.77316500996958E-06 3.90583331731785E-08 -9.4461335489525E-03 -3.79522058981708E-07 5.77644549646950E-06  
 2.43925811402113E-05 1.49705545997396E-05 7.61105745290699E-07 -1.41446408357830E-02 -7.77019835057204E-07  
 -1.21016874810486E-06 1.78696095408783E-06 2.27846040264195E-05 4.92485109887208E-05 1.10222220254220E-06  
 -1.33015172005733E-05 -4.50728975877649E-05 -5.97518694435536E-02 -1.54174986307605E-01 8.88079004661466E-02  
 -6.60615635119451E-06 -9.72100150329739E-06 4.40840615714454E-07 1.31643196952775E-02 -8.90555932072850E-02  
 -2.18234111288384E-06 1.16000718262740E-06 1.12285207611489E-05 -8.87629701500905E-02 -2.98148686306329E-01  
 -1.38296309795819E-02 1.64144184368569E-03 3.79299733074242E-04 8.74487665797705E-03 2.98685904799031E-05  
 7.44699936866574E-05 -6.40022927556687E-05 7.68471674003039E-07 2.58782724173345E-03 -3.72538379295102E-06  
 8.87281889975031E-02 2.98043267444490E-01 1.38588297297838E-02 -1.64241640285365E-03 3.80180170441865E-04  
 -8.74201228204099E-03

## \* ORBITAL 1 10

5.95938346786265E-02 -1.34871672409758E-01 -2.30763452778576E-01 -1.84626631107055E-02 -4.06458880165752E-01  
 -2.96166492782806E-01 -3.80332096855121E-02 2.32180403153621E-05 2.02830230814960E-05 8.86238895443350E-06  
 -2.36480834441539E-01 -1.66157127831821E-01 -3.88624528402978E-02 1.30358734378092E-06 7.43187881857939E-08  
 3.78514557091009E-03 2.26555957984058E-03 1.00843592934421E-02 -1.78032239866068E-01 -2.31397963697313E-01  
 -2.50354486403682E-02 4.50803548663527E-04 1.87930577113026E-08 3.51117098891595E-04 1.00478775414499E-01  
 8.72552590859648E-02 2.19753133530538E-02 -2.77789228047804E-03 1.36665372998166E-06 -1.17903850017879E-02  
 -2.10150167495701E-02 5.07894487024660E-02 2.12596943118425E-02 -6.24628420266514E-02 5.16800280243370E-02  
 4.70152326157839E-02 1.35735334937367E-02 -3.46319162041353E-06 -6.15400529408500E-06 -9.95932446039981E-06  
 1.18614774775864E-01 4.75960805189947E-02 -1.69897605180342E-03 4.52748817563556E-06 1.40694160753492E-06  
 8.00679100138149E-03 -1.91159914035131E-02 -5.22087883786463E-03 1.85530404451571E-02 2.57476576800113E-02  
 1.10454163313995E-02 7.33402625424830E-04 7.63751131312181E-04 1.66315311587543E-03 -7.31643708754039E-02  
 -9.83044588252424E-02 -1.64524359152241E-03 -1.95380714694206E-03 9.86004408826178E-07 1.50013517468689E-03  
 1.85778524134050E-02 2.57844705143166E-02 1.10648401554634E-02 7.32172331826069E-04 -7.64881564930021E-04

1.66345182429393E-03

\* ORBITAL 1 11

8.88337068234868E-02 -5.67517355839694E-01 -4.25677253899620E-02 -4.39205712016375E-02 -8.33868074935616E-03  
1.10729184244640E-02 2.29197275113745E-03 1.46767169942770E-05 1.93672527392861E-06 1.58176030268539E-06  
7.98726076533867E-01 2.57282751830576E-02 1.92060046753274E-02 3.88119060414960E-06 3.18742056961024E-07  
-6.69352731056044E-02 1.52183282876381E-04 3.83013025364787E-02 -1.09653154529417E-02 -1.34068964482411E-02  
-1.02434876886734E-02 -2.11174862757792E-03 2.13582912855486E-07 -2.86761259345808E-03 2.58016426125980E-03  
-4.01082229326266E-02 -1.61465501382272E-02 2.33801866549152E-04 2.80053125738385E-07 8.45142904885317E-03  
-1.00835940227877E-01 3.47410103332854E-01 3.02275087524968E-01 8.55802876658883E-02 1.40756476023339E-02  
-6.90260048581923E-03 3.27666188442183E-03 -1.25555514166755E-05 -3.32252588836679E-06 -3.06920714621543E-06  
6.48750815646178E-01 2.57422475229135E-01 1.40488185184908E-02 3.46729633498886E-07 -2.91600407698775E-06  
7.35353477664348E-02 -8.76918731726094E-04 -1.08284144927422E-03 -2.50473059723948E-02 -4.94442569178110E-02  
-1.53432677346078E-02 7.49244121377737E-05 6.59236434114791E-04 8.45303708110610E-03 -2.15359178472146E-02  
-5.94151892661268E-02 -3.42818483931798E-03 2.19381105752804E-03 -5.74730447392066E-07 7.66600099058665E-03  
-2.50421509006804E-02 -4.94422959168069E-02 -1.53404620391493E-02 7.39999196581197E-05 -6.60063511278068E-04  
8.45238459404315E-03

\* ORBITAL 1 12

-5.02146072160704E-02 1.18297004053306E-01 2.17637066516549E-01 7.04709979666565E-02 2.74016046888689E-01  
2.22950917010224E-01 6.37276321933924E-02 -1.90870058817488E-05 -1.84166371690618E-05 -1.00503851054853E-05  
1.56053805365286E-01 1.23540725306640E-01 3.04516497255194E-02 -3.33358084768435E-07 1.29184535209617E-07  
1.23531843493256E-03 -8.08092757605977E-03 -7.66790647950648E-03 -3.89023261952131E-01 -6.38850021617776E-01  
-9.15494469014820E-02 -5.01946329021915E-03 1.96255643892262E-07 -2.82052410907870E-03 -5.54020942458058E-02  
-4.78053097104864E-02 3.53912897425486E-03 2.26046112638594E-03 -9.94946191651746E-07 7.28729594265443E-03  
1.07746050218019E-02 -2.55433415792798E-02 -1.38454818241083E-02 5.34034549901282E-03 -2.53458379819617E-02  
-3.65740452057264E-02 -3.00787922346407E-02 3.56200006960130E-06 7.06900482152890E-06 1.05366244581893E-05  
-7.10329081372359E-02 -3.64300204018602E-02 -6.34140670021042E-03 -2.64884041805685E-06 -1.17865495207845E-06  
-4.24275908908631E-03 1.22700502234947E-02 2.80741851903611E-03 -9.79976267981546E-03 -1.59488049564733E-02  
1.18969793751938E-02 -4.60402627432459E-04 -2.81330757410111E-04 -1.06503355501568E-03 4.34765545491648E-02  
5.93008984539207E-02 -1.84305403412525E-02 1.24908011140268E-03 -4.82169165065091E-07 -9.77850279301492E-04  
-9.81266198605270E-03 -1.59718357522155E-02 1.18912720689572E-02 -4.60072229636590E-04 2.81965197442941E-04  
-1.06551390180109E-02

## (3) staggered conformation

## \* ORBITAL 1 7

6.71740431491923E-02 -1.49372107344262E-01 -2.51754350886634E-01 -3.71203565312920E-02 1.16348265925139E-02  
 5.25397122590959E-03 -2.56668571888172E-03 3.69613038637178E-01 2.67806507387792E-01 2.02848660936821E-02  
 -2.59589263650172E-01 -1.69387213467428E-01 -2.22428455971613E-02 8.83277719540423E-04 -3.04938669295948E-03  
 5.61017982578526E-03 -1.75409844194644E-03 -8.68892877066040E-03 -1.83609844742857E-01 -2.32438970029221E-01  
 -2.60311439503847E-02 -7.46396454177291E-05 -2.13225073834217E-03 8.64631956011835E-04 1.02859557628228E-01  
 8.01794251203179E-02 1.60369106624071E-02 5.43376294628937E-04 -1.12692667579926E-05 -1.12836638936555E-02  
 -2.37486181688267E-02 5.16407007698127E-02 4.64112802642337E-02 -1.85716136740679E-02 -4.91358404227279E-03  
 1.43429639583592E-03 8.48497104299561E-03 -4.71089251589055E-02 -3.88295520308841E-02 1.38497687329009E-03  
 1.28733107240747E-01 6.12753314094971E-02 3.06307614287354E-03 3.64428418933316E-03 1.70123790525630E-02  
 8.25524219692595E-03 -1.61148597723460E-03 -3.35826500228852E-04 -6.14063265836480E-02 -8.46511330894195E-02  
 -1.18665618437543E-02 -1.55946935463516E-03 1.18360774479805E-03 1.14657278864736E-03 -1.08256739329132E-02  
 -1.88828288257941E-02 -7.60774910252678E-03 4.42176591116416E-04 -1.13941085710104E-03 1.37498941277113E-03  
 3.39984697544863E-02 4.80034051431993E-02 2.36028989682158E-02 9.75112702674854E-04 8.83305038016559E-04  
 1.69739036132095E-03

## \* ORBITAL 1 8

1.10872258049816E-01 -2.47107238528860E-01 -2.63573105607408E-01 6.79416777452956E-02 -3.51179304294479E-02  
 -1.89250275198064E-02 4.19695200289446E-03 1.53747127780393E-01 9.24398083236394E-02 -1.32053242788644E-02  
 3.58518200573420E-01 1.90908133334377E-01 -3.26295749956085E-02 -4.50484002119893E-04 8.13483189108935E-03  
 -2.70134494758873E-02 4.18503466637332E-03 -8.49283947327790E-03 -5.84272181097582E-03 8.82059565813123E-04  
 4.35874652583834E-03 -6.44846415983290E-05 -7.61673544008957E-05 4.06805274260512E-04 9.87052236701984E-02  
 1.02756100172667E-01 3.49367104614997E-02 -6.52103283829490E-04 -1.58184554032860E-03 5.42858805275398E-03  
 5.86540127532752E-02 -1.24270589582912E-01 -4.30969129526288E-02 -7.63485010798634E-02 1.42769175609622E-02  
 1.06948229070795E-03 -2.58578710364587E-03 -1.15411711954450E-02 -1.88353742313330E-02 6.94040209693484E-03  
 -3.45984305955867E-01 -1.12897480524434E-01 -3.66619925257382E-02 9.31042206484427E-04 4.77064692095586E-03  
 -3.36685618628686E-02 4.27334809593253E-03 -4.58356151586396E-04 2.66037371996678E-02 3.02708402206298E-02  
 -1.41693610456749E-02 3.63558118402596E-04 -4.61066043356236E-04 -3.89772943824351E-03 3.70690782679072E-02  
 3.79456522514180E-02 7.83593880347845E-03 -1.11669611609909E-03 -1.25730930564745E-05 -3.82007216024035E-03  
 5.01822862312341E-02 5.44076204068830E-02 9.57360711321072E-03 7.35015856837820E-04 1.03516855909767E-03  
 -3.60864573433231E-03

## \* ORBITAL 1 9

4.58269857272266E-03 -1.09181050585849E-02 -2.10812490234700E-02 -2.70509157281453E-02 6.14113386926210E-01  
 4.66022215024585E-01 1.29265285713908E-01 6.28154142493618E-03 4.07414558472171E-04 -6.82040149069737E-03  
 5.15935990294160E-02 4.12448809091246E-02 1.34162549241547E-02 1.24011148766028E-02 1.19319930098072E-03  
 -1.40645546701534E-03 -9.60057290165902E-03 -4.18454456557813E-04 4.02313370842391E-04 1.20896663922184E-03  
 -8.80104881176151E-04 2.21817213777856E-03 1.97299062551495E-06 6.46271724496921E-05 5.94765854643381E-03  
 1.39192744890125E-02 4.7353354456248E-03 2.01268118069433E-02 -7.14034365569673E-05 1.29660281126989E-03  
 -1.87633708804401E-03 2.01318046243309E-03 1.59800831078079E-02 4.29071191054436E-02 -5.00321176509842E-02  
 -2.76177755083350E-02 -3.13724364570125E-02 -1.36731127580431E-03 4.00362037508361E-03 1.57582714015315E-02  
 -9.58068059208416E-04 -1.07078242696978E-03 -1.00538553453672E-03 2.39011867439531E-04 2.92058148779315E-04  
 3.26853192596747E-03 3.11782012263246E-02 -1.04458216113575E-02 4.44926806054935E-02 6.76004780148635E-02  
 -2.13900051164855E-02 -5.68186904346462E-04 -1.51134345217954E-03 -4.71407679857647E-04 -8.74098566800583E-02  
 -1.60982924958356E-01 -1.83052040175875E-02 1.74858358367924E-03 -2.32942281049774E-04 1.21768126604191E-04  
 4.57505993578497E-02 8.14919190468893E-02 1.56121202710898E-02 -3.35476474727309E-04 1.78503827919159E-03  
 -1.74990190029854E-04

## \* ORBITAL 1 10

-6.00383256044630E-02 1.43829879681938E-01 2.68668073376098E-01 1.00529236254259E-01 -4.28520987999263E-03  
 -1.35430387308174E-03 4.60601038357023E-03 -2.70599623294102E-01 -2.24271408371925E-01 -6.35100581556194E-02  
 1.68365652069146E-01 1.30775319902210E-01 3.14072251582754E-02 -1.07827093405587E-03 9.27218760290732E-03  
 4.06882963200944E-03 3.04365859106280E-04 1.05709171979493E-02 -3.87096072332142E-01 -6.67005071972091E-01  
 -1.05432735797950E-01 2.35597349053125E-04 6.94431032813453E-03 -8.06398235512871E-04 -7.31855579008145E-02  
 -6.50612534008776E-02 4.79356416014123E-03 -2.60692122188975E-04 -1.10833583093644E-03 7.52969207265407E-03  
 7.82238706701099E-03 -1.77568365619758E-02 -9.51830308545632E-03 -1.64727853686239E-02 -2.44698892122594E-03  
 -7.95102097762761E-03 -1.37411483303098E-02 1.26451518313353E-02 1.86854730216502E-02 2.38299018256938E-02  
 -6.80712500007412E-02 -3.87854084889013E-02 -1.18861397875654E-02 -1.60498864376122E-03 -1.10903653501188E-02  
 -3.15428653037707E-03 1.05578795585339E-03 1.08511590593216E-03 3.37410612532373E-02 4.92686597488221E-02  
 -1.89240548047322E-02 7.24739912579299E-04 -1.09769100474192E-03 -6.51847651258765E-04 6.09288809068605E-03  
 1.24476317676776E-02 2.08456469186108E-02 -4.10706489931996E-04 4.75851840342230E-04 -7.13566435065639E-04  
 -1.59551692179924E-02 -3.36143950771576E-02 1.35509223758514E-02 -3.41802336511136E-04 6.88337608336173E-04

-1.77569700493193E-03

\* ORBITAL 1 11

-2.20591871188934E-03 3.86675526459081E-02 -3.76471819064047E-02 -6.36241854758374E-02 -8.98224154946349E-01  
6.86472849273363E-01 3.92295890462240E-01 -2.58434561918935E-02 6.36033059800183E-03 3.29268354046879E-03  
-8.51862622460939E-02 6.30588787977169E-02 3.70723892780427E-02 6.14081278050653E-02 3.90398919311607E-03  
-3.91102378798247E-03 -1.42746897383889E-03 6.21990495090856E-03 -2.57230099536036E-03 4.14100898204835E-03  
4.23131931633527E-03 1.36788567108105E-02 -4.77256904692583E-04 8.46640048916454E-04 4.51001652038261E-03  
1.37573861950328E-02 4.10566651440763E-03 1.34855306022155E-02 4.36526092943678E-04 8.12210940663774E-04  
-4.65372928607863E-04 -6.95442277020672E-03 3.97832576168062E-02 1.29217976912418E-01 5.24690009680443E-02  
1.58871442047687E-01 -1.17311304557223E-01 1.32536807196854E-03 1.49099156587542E-02 2.16337183970682E-02  
-1.40321604975666E-02 -4.56381084317681E-03 -4.43483679198175E-03 1.41077092241729E-03 1.14479985352773E-03  
7.19330600316583E-03 8.29178145002176E-02 -1.82900927085689E-02 4.85651523631282E-02 1.30090947180304E-01  
-6.05047311528189E-02 -1.51469493741511E-03 -1.58431511110519E-03 -6.18551068521212E-03 -1.05773088904173E-02  
-3.55245564108164E-01 -2.56709821860239E-03 3.75853195696907E-06 9.15507637581013E-05 9.17732146196246E-03  
5.10616329409828E-02 1.70060700490208E-01 -1.01646304805556E-02 -1.20906879933201E-03 1.61776772745518E-03  
-5.80759659159900E-03

\* ORBITAL 1 12

8.26795528186377E-02 -5.13337572798060E-01 -5.93589709565210E-02 -5.04445804178944E-02 -8.77338800844959E-02  
-7.44659191174298E-04 1.85871168848586E-04 4.40048597352379E-02 -1.91802868680702E-02 -6.98315463773965E-03  
7.99908082230054E-01 4.33914130914112E-02 1.65462115185651E-02 2.61358395210401E-03 -1.31101431779981E-02  
-6.34226711175674E-02 5.42172766837738E-03 -3.81710423272272E-02 -8.54681224619553E-03 -2.22345531372216E-02  
-1.36712741254345E-02 2.81968921567345E-04 4.21280690761463E-03 -3.13309726614761E-03 -9.22318075160478E-03  
-4.47420321032761E-02 -1.40658337599859E-02 -7.69186492323275E-04 3.40110993053034E-03 6.90369192304213E-03  
-9.95313384470276E-02 3.36638103603227E-01 3.14573179027827E-01 8.67793420504925E-02 -2.74551660336080E-02  
-1.43969985441907E-02 8.81080521097865E-05 -1.31168205531794E-03 6.37051083935415E-03 2.31823931753785E-03  
6.35971833334797E-01 2.66130232199274E-01 1.48515678857791E-02 3.25794508920569E-04 2.40349443498857E-03  
6.80421376879681E-02 -3.94946590986907E-03 8.45717319449445E-04 -2.19173449585938E-02 -5.41089663168408E-02  
-1.03921632600208E-02 3.39609456052181E-04 -1.53766993210655E-03 7.80338808549958E-03 -3.00485172642187E-02  
-5.35424872480212E-02 -1.42314866431382E-02 -3.92446792288552E-04 -9.72034534199439E-05 8.65693871822793E-03  
-1.99134401996686E-02 -5.15952257203819E-02 -1.01482761229589E-02 2.98851340407911E-04 1.27973646289832E-03  
8.01864648228479E-03

## (4) H6-C4-N1-H3 dihedral angle equaling 95°

## \* ORBITAL 1 7

6.67236857426892E-02 -1.48287738968265E-01 -2.50604858508387E-01 -3.96432114821183E-02 4.89517039524126E-02  
 3.67035359102627E-02 7.28039980005831E-03 3.70871959545707E-01 2.68789504115448E-01 2.02307386641531E-02  
 -2.54230219970005E-01 -1.65145248271552E-01 -2.08577101851064E-02 -8.88129111534371E-04 -3.20278884200112E-03  
 5.53954664803697E-03 -2.05370300331564E-03 -8.72951778568173E-03 -1.83833362446729E-01 -3.2645202310176E-01  
 -2.63141758530893E-02 -1.92226339037804E-04 -2.13623137542755E-03 8.58207671359089E-04 1.02444019393466E-01  
 8.12052585061659E-02 1.69018956116048E-02 2.86701772861657E-03 1.36374244865514E-04 -1.09916981720152E-02  
 -2.36973140586299E-02 5.14387210111169E-02 4.70690787882478E-02 -1.58547352885416E-02 -5.88780688568614E-03  
 -6.21796401482359E-04 5.93048399433811E-03 -4.72703619902576E-02 -3.94966129366656E-02 7.93301649861932E-04  
 1.27858066924886E-01 6.08501155051715E-02 2.98433117312271E-03 3.48963584877524E-03 1.70831459148745E-02  
 8.43196537812773E-03 2.77507138429056E-04 -9.23659160656594E-04 -5.93434994147278E-02 -7.99273097050302E-02  
 -1.18451798998833E-02 -1.53544417357237E-03 1.14662996426372E-03 1.12708450579562E-03 -1.49851782997280E-02  
 -2.72073697396600E-02 -8.69036192999604E-03 4.72515720701092E-04 -1.14430528135645E-03 1.44928096895905E-03  
 3.63158903309112E-02 5.19107856591477E-02 2.32311850095300E-02 1.01224071470560E-03 9.52509743742654E-04  
 1.60156994934787E-03

## \* ORBITAL 1 8

1.11023301266297E-01 -2.47457988851227E-01 -2.64215921662708E-01 6.84247769919559E-02 -5.12315093911087E-02  
 -2.78236357987055E-02 4.94935081299566E-03 1.53260120128551E-01 9.21642747734040E-02 -1.38226189093949E-02  
 3.56532466784168E-01 1.89788367658730E-01 -3.30044691309318E-02 -2.30866868362534E-03 7.92241807191885E-03  
 -2.71267396286169E-02 3.45767849862670E-03 -8.28558425199508E-03 -5.73461126292988E-03 5.32676035440676E-04  
 4.18864935420092E-03 -1.24779520362891E-04 -7.92489968595434E-05 4.05813317693488E-04 9.87795667959720E-02  
 1.02886861141706E-01 3.56169207752814E-02 -5.27062566331492E-04 -1.59940573824441E-03 5.41432306552028E-03  
 5.86311308805394E-02 -1.24248930112113E-01 -4.29203247445622E-02 -7.65448807033931E-02 1.44386527133256E-02  
 2.09657011245660E-03 -2.78865499153188E-03 -1.17519220512862E-02 -1.90075885232255E-02 7.71060882247465E-03  
 -3.45693813956061E-01 -1.12733219186447E-01 -3.69998008814241E-02 9.04758273657364E-04 4.75092630052580E-03  
 -3.37339364761219E-02 3.75359611812553E-03 -3.14237304243904E-04 2.60816363430308E-02 2.94903139741943E-02  
 -1.60801516464956E-02 3.44687095653076E-04 -4.53970228875413E-04 -3.88386943675049E-03 3.79632215754502E-02  
 3.89542838505146E-02 8.79878957331970E-03 -1.10901535401382E-03 -1.72023480713820E-05 -3.82402373261684E-03  
 4.97337651709503E-02 5.34194256514183E-02 1.00062868146402E-02 7.22139766203082E-04 1.02079449623636E-03  
 -3.60662037828716E-03

## \* ORBITAL 1 9

-7.99938579652873E-03 1.91944546784918E-02 2.81613084921286E-02 -3.16130514898854E-02 6.08107127363858E-01  
 4.61774710367851E-01 1.28274056716191E-01 -4.19118915108048E-04 1.77632350639999E-03 7.25055658711659E-03  
 9.74604089196129E-02 7.30185320467580E-02 2.29992924802610E-02 1.23627057771690E-02 1.51928359600664E-03  
 -2.06798210384366E-03 -9.46216985624526E-03 -5.96754143804611E-04 -3.20600066300703E-03 5.18383177490762E-03  
 2.25573324585267E-03 2.19577659608510E-03 -9.91935112608798E-05 2.02850528021637E-04 -1.28787164618083E-02  
 -5.00668658227289E-03 1.85707556121356E-03 1.97474658982953E-02 1.87884081946192E-03 3.35294391764483E-03  
 1.68759176017832E-03 -6.66051055788748E-03 1.32434419426193E-02 5.98083503182734E-02 -4.93424282417319E-02  
 -2.77267918770425E-02 -3.09714762642533E-02 1.64719226753191E-03 4.01411699577010E-03 9.51096280532961E-03  
 -2.28088234649696E-02 -8.71952826547004E-03 6.52042632209008E-04 2.02390160641420E-04 1.48714006855496E-04  
 2.02682439950485E-03 3.12257310452432E-02 -1.03346324200371E-02 4.81733400642463E-02 7.16993295511670E-02  
 -1.74055156229595E-02 -4.36879742989121E-04 -1.65210850508146E-03 -6.54463098042643E-04 -8.49009429216553E-02  
 -1.57054669664101E-01 -2.08362785897869E-02 1.65604074141612E-03 -1.25645121054008E-04 -1.76123113961200E-04  
 4.64408257260368E-02 8.49604486525660E-02 9.65236291676897E-03 -3.6000830898151E-04 1.83963337506493E-03  
 -5.3503625436672E-04

## \* ORBITAL 1 10

-5.98092855064545E-02 1.43117750830328E-01 2.68360695988651E-01 1.03361062844799E-01 -3.69691636397283E-02  
 -3.32081031040458E-02 -1.18616480916202E-02 -2.71453501038250E-01 -2.24780993628969E-01 -6.45964633579568E-02  
 1.64225664599865E-01 1.26617775296809E-01 2.94411341688208E-02 -1.20635784522005E-03 9.31659947039404E-03  
 4.04692693066222E-03 6.52809221514117E-04 1.04728657953311E-02 -3.86814799941506E-01 -6.67536653275058E-01  
 -1.06550853247352E-01 5.42870293975172E-04 6.97025521516742E-03 -8.10183870588647E-04 -7.22568411498446E-02  
 -6.50411727270390E-02 4.94600955558984E-03 -2.12480033923116E-03 -1.19105810643139E-03 7.32227681251164E-03  
 7.81189568052821E-03 -1.75359363453787E-02 -1.08759988175772E-02 -2.07282911359079E-02 -2.59588711768408E-03  
 -6.88502908889613E-03 -7.03817753355971E-03 1.20157565177601E-02 1.82353155666286E-02 2.50412525591514E-02  
 -6.79495011834598E-02 -3.91401244502393E-02 -1.14775844639186E-02 -1.71129077593156E-03 -1.11638276727015E-02  
 -3.34555914273057E-03 -6.85460604925186E-04 1.60666990204027E-03 3.19210521487307E-02 4.50909867070128E-02  
 -1.81598720295576E-02 6.56732670419123E-04 -1.06913737264894E-03 -6.00089768336063E-04 9.75372305475292E-03  
 2.12667712665744E-02 1.84655194028810E-02 -4.29439078262806E-04 4.03995446901754E-04 -7.82352216732923E-04  
 -1.80984319487475E-02 -3.77746197544225E-02 1.77930764313859E-02 -2.65835066861510E-04 7.14835898029488E-04

-1.74225106621038E-03

\* ORBITAL 1 11

-2.48484330214677E-04 -1.04255551116022E-03 1.15562882324001E-02 -1.01498389682619E-01 -8.92538920940077E-01  
6.83686379332926E-01 3.89637885969216E-01 -4.69080267018314E-02 3.43568263535519E-02 3.56362691910284E-02  
-1.27313097585321E-01 8.56978034396647E-02 6.32873697942289E-02 6.03039623126794E-02 6.03907782056448E-03  
7.94148674693953E-03 -6.23124318310342E-03 -1.73352512780707E-02 -5.78411879926023E-03 4.28713133458434E-02  
1.81370762257029E-02 1.35790102278151E-02 -5.53398517526834E-04 1.62434363677329E-03 -3.11975486456493E-04  
1.83478350092518E-03 -8.68270432097772E-03 1.33478623052880E-02 1.86534032807412E-03 1.73150053136930E-03  
2.17606905610625E-03 -2.06737521914511E-02 4.37242123122988E-02 1.84160288505190E-01 5.30968978608503E-02  
1.59567360058003E-01 -1.13452056037169E-01 4.96643162997055E-03 1.86601669494946E-02 7.53559280045131E-03  
-3.05381660427608E-02 -3.48823329812966E-03 1.69037620962086E-03 1.60939180720434E-03 4.31490959172323E-03  
6.49518233630300E-03 8.27444822346688E-02 -1.83854174021895E-02 4.49166471032833E-02 1.24200160093671E-01  
-5.26693850512618E-02 -1.65374486563385E-03 -1.60132772008071E-03 -6.12457798187591E-03 -1.05602052376658E-01  
-3.52718619926221E-01 -1.51032672236736E-02 8.33941853052532E-05 -9.34600138880032E-05 8.62136670811578E-03  
5.29148133740041E-02 1.85548423678215E-01 -2.39016626352199E-02 -1.19395728019274E-03 1.56687816934806E-03  
-6.48697036906558E-03

\* ORBITAL 1 12

8.27736292826914E-02 -5.14311762900426E-01 -5.86952044280218E-02 -5.31740874909600E-02 -1.08876095496892E-01  
1.22356489001643E-02 8.76387179491353E-03 4.23646414026778E-02 -1.86162949650896E-02 -6.40559337468139E-03  
7.96861095568727E-01 4.50865596626762E-02 1.79947919389164E-02 -1.56338766927144E-03 -1.34712082705908E-02  
-6.26937819541728E-02 8.78017947506208E-03 -3.85483491905211E-02 -8.88736379313153E-03 -2.10088848743316E-02  
-1.31696071932414E-02 1.19826605868359E-03 4.10949928308443E-03 -3.01090627864433E-03 -9.13574162936517E-03  
-4.40573747955079E-02 -1.40203318828226E-02 -7.43053030264422E-04 3.33623262188232E-03 6.85883286462718E-03  
-9.95026042588931E-02 3.36252903813530E-01 3.15443311279602E-01 9.04862054027002E-02 -2.59255298409995E-02  
-1.30536026333256E-02 -3.13502826596235E-03 -1.05066873770163E-03 6.93520713022318E-03 2.35743877477030E-03  
6.35575355735845E-01 2.66035282055164E-01 1.47831366626677E-02 3.44252435691506E-04 2.58161043928390E-03  
6.81920672600217E-02 -2.99640438158791E-03 6.28275955890526E-04 -2.14032767346961E-02 -5.25103530735386E-02  
-1.12429368638260E-02 3.52800827206628E-04 -1.53996430258738E-03 7.68442251593579E-03 -3.15811776328503E-02  
-5.88980458047392E-02 -1.45216773324787E-02 -3.88518905552369E-04 -9.73926861358699E-05 8.75085641304359E-03  
-1.90535747388819E-02 -4.84819454036321E-02 -1.08624374999972E-02 3.20212148565317E-04 1.28555671150593E-03  
7.95403504354525E-03

## (5) H6-C4-N1-H3 dihedral angle equaling 95°

## \* ORBITAL 1 7

1.11225813818391E-01 -2.47980061368263E-01 -2.65219009624327E-01 6.88066514081701E-02 -6.33710038570973E-02  
 -3.44766246266541E-02 5.51518418541333E-03 1.52585040108636E-01 9.16032116558028E-02 -1.45591020136873E-02  
 3.54651660028401E-01 1.88638342910001E-01 -3.34753504742699E-02 -3.67864255472503E-03 7.68026912475787E-03  
 -2.72117075502667E-02 2.93283258742157E-03 -7.93276019170912E-03 -5.64226174523073E-03 -1.16580223275879E-04  
 3.96295918863160E-03 -1.79334187710788E-04 -8.58382451974690E-05 4.15100171433958E-04 9.90524434333752E-02  
 1.03465767063999E-01 3.63262552515430E-02 -4.25767299711904E-04 -1.60927141650459E-03 5.37917954625479E-03  
 5.85446367205102E-02 -1.24074671756189E-01 -4.26653148035485E-02 -7.70466931053255E-02 1.44976646707746E-02  
 2.80371925225132E-03 -2.84211075461137E-03 -1.18672046433974E-02 -1.89217535112895E-02 8.50755364977011E-03  
 -3.45256886557343E-01 -1.12529488986557E-01 -3.73069044801986E-02 8.77654128157578E-04 4.73554064740996E-03  
 -3.37827296490284E-02 3.35983974263095E-03 -2.02280498928323E-04 2.57189389901339E-02 2.88176750063399E-02  
 -1.76105018401147E-02 3.27537446421088E-04 -4.50963672773446E-04 -3.86924547545412E-03 3.86176504823702E-02  
 3.96754118787004E-02 9.42210310560027E-03 -1.10255042227605E-03 -2.54583014859006E-05 -3.82271082516842E-03  
 4.93747010673236E-02 5.26683383672322E-02 1.05918887792754E-02 7.13451044877871E-04 1.01202309994732E-03  
 -3.60121129841543E-03

## \* ORBITAL 1 8

-6.50664648748494E-02 1.44289093575181E-01 2.45390589127758E-01 4.36832615940745E-02 -7.84493203219000E-02  
 -6.16173998979629E-02 -1.49295511009184E-02 -3.73398870653007E-01 -2.70824029543604E-01 -2.01029263523760E-02  
 2.46190597096647E-01 1.59272850250415E-01 1.88147677245241E-02 2.20829432243342E-03 3.32350399965205E-03  
 -5.43494357050369E-03 2.27675493254771E-03 8.76010438330074E-03 1.84538588176411E-01 2.33658419164199E-01  
 2.67552308583571E-02 3.04337036375045E-04 2.16194731786826E-03 -8.74023005152585E-04 -1.00711174229680E-01  
 -8.23315016401368E-02 -1.78771566026943E-02 -4.61135901190088E-03 -5.52715591828806E-04 1.05867601690496E-02  
 2.33507850634187E-02 -5.05217697429177E-02 -4.73405306509320E-02 1.13626511286937E-02 6.75582631726254E-03  
 2.45686767327391E-03 -3.95810793333704E-03 4.72459798239157E-02 3.97443222152304E-02 -7.05138455157638E-04  
 -1.25528833467464E-01 -5.98675565414467E-02 -3.24131153665077E-03 -3.37883936768001E-03 -1.72429370809215E-02  
 -8.50864979264309E-03 -1.78833879473939E-03 1.37788250107476E-03 5.76041201483024E-02 7.63665733089900E-02  
 1.25537151886479E-02 1.51629380771695E-03 -1.11040381657731E-03 -1.09698454378149E-03 1.82399528463101E-02  
 3.34791637879018E-02 9.98446822654583E-03 -4.95924508523670E-04 1.15295734649974E-03 -1.47982601360326E-03  
 -3.84187238268777E-02 -5.57204012470658E-02 -2.33270789014491E-02 -1.05100153248147E-03 -1.01158579672082E-03  
 -1.49503459775398E-03

## \* ORBITAL 1 9

1.77295898460980E-02 -4.24863227328850E-02 -6.61408580848891E-02 3.50375383552699E-02 -5.98786548922336E-01  
 -4.54195342257733E-01 -1.25957472802966E-01 7.92172978451853E-03 -7.56009852616151E-04 -1.71191810849259E-02  
 -1.32655880728179E-01 -9.71736819124129E-02 -3.02087593959947E-02 -1.23444989585767E-02 -1.79026142269083E-03  
 2.56554335880987E-03 9.26498385010226E-03 6.84595140204284E-04 5.84361744314859E-03 -8.09280606914418E-03  
 4.66329494336366E-03 -2.13778845841358E-03 1.74324697639066E-04 -3.04359221238424E-04 2.74180115188999E-02  
 -1.91458491086953E-02 6.83499667362114E-03 -1.89950676864716E-02 -3.24472024373058E-03 -4.89859967136685E-03  
 -4.46894541412035E-03 1.34031164734428E-02 -1.09393184753032E-02 -7.23819204303686E-02 4.88290930707859E-02  
 2.78468221553210E-02 3.03280089600336E-02 -4.19018319683014E-03 -4.30454719843244E-03 -4.12524472698882E-03  
 3.98682411665142E-02 1.47183892547528E-02 -1.92531141072571E-03 -1.80374440677574E-04 7.84563608599500E-05  
 -1.02206825023288E-03 -3.10111818007613E-02 1.01754351496200E-02 -5.10446573027356E-02 -7.48938465850918E-02  
 1.30886886845451E-02 3.26426087453854E-04 1.77055934046472E-03 7.92201879358936E-04 8.24180874456719E-02  
 1.52607784238238E-01 2.25905501113887E-02 -1.57830097855110E-03 3.70743120510547E-05 4.22789133666303E-04  
 -4.64567012689114E-02 -8.64022954340643E-02 -3.82549765900139E-03 3.93275002511107E-04 -1.86664894337545E-03  
 8.02601020402178E-04

## \* ORBITAL 1 10

5.90249001515587E-02 -1.40788269181144E-01 -2.66706377581287E-01 -1.10218747753756E-01 6.28032456717823E-02  
 5.85451131761249E-02 2.47867997557773E-02 2.74089708506379E-01 2.26548544085886E-01 6.42809723914301E-02  
 -1.58768148371891E-01 -1.21570309266857E-01 -2.65114664889674E-02 1.42923913376900E-03 -9.44707937949576E-03  
 -3.90455108710716E-03 -9.56065960434347E-04 -1.02257016001236E-02 3.85966769807194E-01 6.68166349539847E-01  
 1.08207538586732E-01 -8.97636683665414E-04 -7.09304181047978E-03 9.26809543590386E-04 6.95461115648308E-02  
 6.58900955804579E-02 -4.42224115558439E-03 3.54810998099612E-03 1.40767308930652E-03 -7.07835025057079E-03  
 -7.71366865735751E-03 1.69788780778421E-02 1.30733910622398E-02 2.81112892720563E-02 2.61518783653525E-03  
 5.66423309893026E-03 1.55521998880536E-03 -1.16023521897342E-02 -1.73815646188156E-02 -2.47661217598209E-02  
 6.71725828360157E-02 3.98148768032065E-02 1.16626419365245E-02 1.82414701186169E-03 1.13769681173102E-02  
 3.46756478700327E-03 2.06164719254754E-03 -1.97765694094131E-03 -3.07177252135450E-02 -4.25871767410612E-02  
 1.54850216644440E-02 -6.15690276429714E-04 1.04468864628930E-03 5.51743386278914E-04 -1.25939115930289E-02  
 -2.77724231017567E-02 -1.69730480773843E-02 4.49617460699281E-04 -3.67858293560703E-04 8.26324539074719E-04  
 2.01679339652094E-02 4.19887295948485E-02 -2.04223624184088E-02 2.09271377584026E-04 -7.18592835036092E-04

1.69033523059795E-03

\* ORBITAL 1 11

8.28536038538458E-02 -5.16016066603475E-01 -5.65531839099280E-02 -5.47865585626795E-02 -1.24570853035793E-01  
2.19235639175875E-02 1.51164364497472E-02 4.09093605225634E-02 -1.74579191638037E-02 -5.38618863776801E-03  
7.93979273935333E-01 4.63726174889286E-02 1.91967253074473E-02 -4.57738542861053E-03 -1.39912462406013E-02  
-6.20478054196109E-02 1.13807136302960E-02 -3.83885820624440E-02 -9.56728871240912E-03 -1.89010993422072E-02  
-1.20001633940342E-02 1.84715230544488E-03 3.79782689199143E-03 -2.82607170332756E-03 -9.51323764705376E-03  
-4.41322223349123E-02 -1.39804724606593E-02 -6.90731640723965E-04 3.19945836711812E-03 6.82449008096472E-03  
-9.94041926089404E-02 3.35740235530415E-01 3.15298499793545E-01 9.31162770818884E-02 -2.47477315346442E-02  
-1.20861595506420E-02 -5.38140099059514E-03 -7.63434614513480E-04 7.56800118795665E-03 2.11106191376019E-03  
6.35054779319313E-01 2.65599813052463E-01 1.44342824325639E-02 3.49312255278098E-04 2.84579739118575E-03  
6.83740189998291E-02 -2.31937620672479E-03 4.79088595341080E-04 -2.11157967865276E-02 -5.15262186768835E-02  
-1.16148299069572E-02 3.67765458664320E-04 -1.54798322341320E-03 7.60315840746492E-03 -3.27025192486771E-02  
-6.27026225374827E-02 -1.50239307606072E-02 -3.88178438954101E-04 -1.10527837858649E-04 8.79818565092738E-03  
-1.83118037561136E-02 -4.56853419095368E-02 -1.16827439235974E-02 3.54429450790671E-04 1.28605816260647E-03  
7.90036535584099E-03

\* ORBITAL 1 12

1.35616701021475E-03 -3.32891876529257E-02 5.07879298324494E-02 -1.30292047427992E-01 -8.86404579240877E-01  
6.81341308615361E-01 3.86890745763333E-01 -5.94307764136811E-02 5.31536433852426E-02 5.75809688081720E-02  
-1.59665273277172E-01 1.03194604138761E-01 8.34480768983039E-02 5.82494269922861E-02 7.51880388270132E-03  
1.68435592803365E-02 -1.14944145587381E-02 -3.48549634770973E-02 -8.18676377663365E-03 7.22782175998716E-02  
2.88389067400680E-02 1.33555970226689E-02 -6.51907595344276E-04 2.22321633306722E-03 -4.35300962531021E-03  
-6.45335760646550E-03 -1.79826509171621E-02 1.31586248113674E-02 2.79942527857904E-03 2.41734681109077E-03  
4.20087020325909E-03 -3.11961376733196E-02 4.63740260705963E-02 2.25751292129439E-01 5.32268404849921E-02  
1.58719950459573E-01 -1.10698189531858E-01 7.68302823528608E-03 2.16482163444547E-02 -2.59120932318937E-03  
-4.31149629888044E-02 -2.85211885448999E-03 6.13807474636390E-03 1.79571234499934E-03 6.48302204485572E-03  
5.98085644412360E-03 8.24270819792409E-02 -1.83953751599342E-02 4.22417238338814E-02 1.19590178968342E-01  
-4.65877058195089E-02 -1.74612234979687E-03 -1.61598634252215E-03 -6.11413766661292E-03 -1.05214445629592E-01  
-3.49045169134636E-01 -2.42892551037646E-02 1.41388040368526E-04 -2.34872025169003E-04 8.14652638826758E-03  
5.39421378831605E-02 1.96043824942058E-01 -3.49604749445602E-02 -1.21055152036494E-03 1.52562331865835E-03  
-6.92589252733711E-03
